# Supplementary material for: Companion robots for older people: importance of user-centred design demonstrated through observations and focus groups comparing preferences of older people and roboticists in South West England
Source: PubMed Central journal article supplement — BMJ Open. 2019 Sep 26;9(9):e032468. doi: 10.1136/bmjopen-2019-032468 (PMC6773331; doi:10.1136/bmjopen-2019-032468), 2019-09-26
Supplement: bmjopen-2019-032468.draft_revisions.pdf [file bmjopen-2019-032468.draft_revisions.pdf]

# BMJ Open

BMJ Open is committed to open peer review. As part of this commitment we make the peer review history of every article we publish publicly available.

When an article is published we post the peer reviewers' comments and the authors' responses online. We also post the versions of the paper that were used during peer review. These are the versions that the peer review comments apply to.

The versions of the paper that follow are the versions that were submitted during the peer review process. They are not the versions of record or the final published versions. They should not be cited or distributed as the published version of this manuscript.

BMJ Open is an open access journal and the full, final, typeset and author-corrected version of record of the manuscript is available on our site with no access controls, subscription charges or pay-per-view fees (<http://bmjopen.bmj.com>).

If you have any questions on BMJ Open's open peer review process please email [info.bmjopen@bmj.com](mailto:info.bmjopen@bmj.com)

# BMJ Open

## Companion robots for older people: comparing the preferences of older people and roboticists shows the importance of user-centred design

|                               |                                                                                                                                                                                                                                                                                                                                                                                              |
|-------------------------------|----------------------------------------------------------------------------------------------------------------------------------------------------------------------------------------------------------------------------------------------------------------------------------------------------------------------------------------------------------------------------------------------|
| Journal:                      | <i>BMJ Open</i>                                                                                                                                                                                                                                                                                                                                                                              |
| Manuscript ID                 | bmjopen-2019-032468                                                                                                                                                                                                                                                                                                                                                                          |
| Article Type:                 | Research                                                                                                                                                                                                                                                                                                                                                                                     |
| Date Submitted by the Author: | 25-Jun-2019                                                                                                                                                                                                                                                                                                                                                                                  |
| Complete List of Authors:     | Bradwell, Hannah; University of Plymouth, Faculty of Health and Human Sciences<br>Edwards, Katie; University of Plymouth, Faculty of Health and Human Sciences<br>Winnington, Rhona; Auckland University of Technology<br>Thill, Serge; Radboud University Donders Institute for Brain Cognition and Behaviour<br>Jones, Ray; Plymouth University, Faculty of Health, Education, and Society |
| Keywords:                     | GERIATRIC MEDICINE, Dementia < NEUROLOGY, Health informatics < BIOTECHNOLOGY & BIOINFORMATICS, PUBLIC HEALTH, BIOTECHNOLOGY & BIOINFORMATICS                                                                                                                                                                                                                                                 |
|                               |                                                                                                                                                                                                                                                                                                                                                                                              |

SCHOLARONE™  
Manuscripts

**Title:** Companion robots for older people: comparing the preferences of older people and roboticists shows the importance of user-centred design.

**Authors:** Bradwell, H. L<sup>1\*</sup>, Edwards, K. J<sup>1.</sup>, Winnington, R<sup>1,2.</sup>, Thill, S<sup>3.</sup> and Jones, R. B<sup>1.</sup>

<sup>1</sup> Faculty of Health and Human Sciences, University of Plymouth, Plymouth, Devon, UK

<sup>2</sup> Auckland University of Technology, 90 Akorange Drive, Northcote, Auckland, NZ.

<sup>3</sup> Donders Institute for Brain, Cognition, and Behaviour, Radboud University, Nijmegen 6525 HR, The Netherlands

\* Corresponding author: hannah.bradwell@plymouth.ac.uk, Academic Office (S06) Knowledge Spa, Royal Cornwall Hospital Treliske, Truro, Cornwall, UK, TR1 3HD, tel: 07975927341

katie.edwards@plymouth.ac.uk, rhona.winnington@aut.ac.nz, s.thill@donders.ru.nl, ray.jones@plymouth.ac.uk

Orcid Numbers:

H. Bradwell: 0000-0002-9103-1069

K. Edwards: 0000-0001-6212-6010

R. Jones: 0000-0002-2963-3421

S. Thill: 0000-0003-1177-4119

R. Winnington: 0000-0002-6504-2856

Main Text: 6779

## Abstract

### Background:

Companion robots, such as Paro, may reduce agitation and depression for older people with dementia. However, contradictory outcomes in social robot research suggest robot design is not always optimal. While many researchers therefore suggest user-centred design is important, there is still little evidence as to the difference this might make. Here, we assess its importance by comparing perceptions of companion robot design between older people (end-users) and roboticists (developers).

### Methods

Seventeen older people and 18 roboticists interacted, at two separate events and in groups of 2-4 people, with eight different companion robots. These interactions were recorded, participants' comments and observations were transcribed and content analysed. Subsequently, each group participated in focus group discussions on perceptions of companion robot design. Discussions were recorded, transcribed and content analysed.

### Results

We found significant differences in design preferences between older people and roboticists. Older people desired soft, furry, interactive animals that were familiar and realistic, while unfamiliar forms were perceived as more infantilizing. By contrast, most roboticists eschewed familiar and realistic design, thinking unfamiliar forms better suited older people. Older people also expressed a desire for features not seen as important by developers. For example, a large difference was seen in attitude towards the ability to talk: 12/17 (71%) older people but only 2/18 (11%) roboticists requested human

1  
2  
3 speech. Older people also responded positively towards life-simulation  
4 features, eye contact, personalisation of robots and obeying commands,  
5 features undervalued by roboticists. These differences were reflected in  
6 preferred device selection, with the “Joy for All” cat chosen most often by older  
7 people, while Paro was chosen most often by roboticists.  
8  
9

## 14 **Conclusions**

15  
16 The observed mis-alignment of opinion between end-users and developers on  
17 desirable design features of companion robots demonstrates the need for user-  
18 centred design in the development process.  
19  
20  
21  
22

23  
24  
25 **Keywords:** Social robots, companion robots, acceptability, Paro, dementia,  
26 older people, gerontology, healthcare, social care, user-centered design  
27  
28  
29

## 30 **Strengths and limitations of this study**

- 31  
32  
33
- 34 • Novel direct comparison between older people (end-users) and roboticists  
35 (developers).  
36
  - 37 • The participation of older people themselves, contrasts with previous research  
38 using care provider opinions as proxy.  
39
  - 40 • The range of robots and toys, some specifically designed for older people,  
41 extends previous studies with a limited array of robot features.  
42
  - 43 • The short interaction time between participants and robots of ten minutes  
44 allowed limited time for familiarity with devices.  
45
  - 46 • Small sample size compared to previous research (although in-depth  
47 qualitative analysis does allow for increased confidence in results and smaller  
48  
49  
50  
51  
52  
53  
54  
55  
56  
57  
58  
59  
60

1  
2  
3 group size) may have limited influence of social desirability bias or group  
4  
5 dynamics  
6  
7  
8  
9

## 10 **BACKGROUND**

11 Life expectancy, and thus the proportion of the population at retirement age or above,  
12 is increasing worldwide (1). As human function deteriorates with age (2), this creates  
13 a greater demand for services (3) while the numbers of health and social care workers  
14 decreases (1), putting pressure on health and social care resources (4). Steptoe et al.  
15 (5) suggested there is a growing need for research on maintaining wellbeing: while  
16 supporting physical functioning is often addressed (6), the psychological health of the  
17 ageing population has received less attention. Assistive robotics, which can be  
18 classified as rehabilitation and social robots (7), could help in this respect and alleviate  
19 this pressure on health and social care resources (3).  
20  
21  
22  
23  
24  
25  
26  
27  
28  
29  
30  
31  
32  
33  
34

35 In this paper, we consider companion robots – a subset of social robots often designed  
36 congruent with animal aesthetics and behaviours (7, 8). A prominent example of a  
37 companion robot is Paro, the robot seal (9). Research has suggested numerous  
38 benefits of interacting with Paro, including reduced agitation and depression in  
39 dementia (10, 11), more adaptive stress response (12), reduced care provider burden  
40 (12), and significantly improved affect and communication between dementia patients  
41 and day care staff (13). Further research has suggested Paro may reduce  
42 psychoactive and analgesic medication use (14), and even decrease blood pressure  
43 (15). Generally speaking, companion robots alleviate issues of traditional animal  
44 assisted therapy (16), including reducing risks for the animals themselves (9, 16).  
45  
46  
47  
48  
49  
50  
51  
52  
53  
54  
55  
56  
57  
58  
59  
60

1  
2  
3 These positive results have however been questioned (17). A comparison between an  
4 active Paro and an inactive one found benefits of the active robot were limited to  
5 engagement (18). Robinson et al. (19) found no significant improvement for  
6 depression (seeing a significant decrease only for loneliness). Thodberg et al. (20),  
7 compared live dog visits to Paro sessions over 6 weeks, and found no improvement  
8 for depression with either intervention. Research assessing the suitability of Paro for  
9 a dementia unit suggested it may need to be adapted for such settings as, for example,  
10 its vocalisations can be distressing (21). Moyle et al. (22) also found considerable  
11 variation in responses to Paro in a large randomised controlled trial (RCT).  
12  
13  
14  
15  
16  
17  
18  
19  
20  
21  
22  
23  
24  
25

26 While this disparity may be due to individual variability, it is also possible robot design  
27 factors may be impairing wider acceptance. Similar differences have been observed  
28 for other devices; regarding AIBO, for example, research has both shown good  
29 acceptability (23), and found that it encouraged less interaction than a soft toy (24),  
30 while a review of acceptability towards robots used in aged care suggests a number  
31 of robots have failed (3).  
32  
33  
34  
35  
36  
37  
38  
39  
40  
41

42 The Almere model of acceptability of social robots among older people strongly  
43 suggests acceptability can impact intention to use, and therefore actual use of a device  
44 (25). Furthermore, using robots in contexts they were not designed for can perpetrate  
45 negative perceptions of them and reduce acceptability, which may explain some of the  
46 conflicting results on robot companions (4). User-centred design, in general, thus  
47 requires designers to have a deep understanding of those they design for, and to  
48 involve them in all stages of the process (26).  
49  
50  
51  
52  
53  
54  
55  
56  
57  
58  
59  
60

1  
2  
3 Considering that perceived requirement can vary between stakeholder groups (27), as  
4 can technology acceptance (28), it is likely design requirements would differ between  
5 varied groups of end-users, for example those with physical impairments (29), children  
6 (30), or older people, thus research is required specific to the aim of each robotic  
7 system. Generally, integrating user requirements and experiences into design can be  
8 difficult (29). Similarly, one challenge noted by Chammas et al. (26) is the acceptance,  
9 recognition and incorporation of user-centred design in practice. Therefore,  
10 considering potential additional effort required, evidence establishing the value of this  
11 approach might help to encourage designers to adopt this type of methodology.  
12  
13  
14  
15  
16  
17  
18  
19  
20  
21  
22  
23  
24  
25

26 There currently appears to be little known about how older people perceive robots  
27 (31). One exception is a study that explored meaning behind robotic pets with 41  
28 independent older adults (32). Results suggested robotic pets could provide social  
29 entertainment and interactions, functional support was appealing, but the fiction of  
30 robotic comfort was a potential tension (32). Participants reported preference for soft  
31 fur and suggested play features as an improvement, which appear absent on currently  
32 available companion robots. A limitation was the use of unfamiliar, often brightly  
33 coloured child-orientated pets, providing a limited range of features for older adults to  
34 inform perceptions on.  
35  
36  
37  
38  
39  
40  
41  
42  
43  
44  
45  
46  
47  
48

49 More generally, while older people and people with dementia are implicated in  
50 companion robot design, they are often not involved (33), even given a clearly  
51 identified need for ensuring devices adequately meet the needs of the end-users (4).  
52 Instead, older people are often assigned stereotypical needs (33), with studies rarely  
53  
54  
55  
56  
57  
58  
59  
60



1  
2  
3 involving older people in robotics design: when involved at all, it is usually through care  
4 providers, and at the end of the design process (32).  
5  
6  
7  
8  
9

10 In this paper, we therefore seek to investigate any notable differences in opinion  
11 between 'robot-users' and 'robot-creators' about the design of companion robots for  
12 older people, and in doing so, provide some initial insight into older peoples design  
13 requirements for companion robots. This evidence of different perceptions between  
14 designers and end-users may also help persuade designers of the importance of user-  
15 centred design. This evidence of different perceptions between  
16 designers and end-users may also help persuade designers of the importance of user-  
17 centred design.  
18  
19  
20  
21  
22  
23  
24

## 25 **METHODS**

### 26 **Design**

27  
28  
29 This study was one of many sub-studies forming a doctoral collaborative-action-  
30 research (CAR) project. We conducted observations of roboticists and older people  
31 separately interacting with a variety of robots, providing a comprehensive range of  
32 features for comparison. Both groups then participated in focus group discussions  
33 informed by their interaction experience.  
34  
35  
36  
37  
38  
39  
40  
41  
42  
43  
44

### 45 **Patient and Public Involvement**

46  
47 Due to the CAR research approach to the wider project, key stakeholders have been  
48 continually involved in the design of the studies forming this doctoral project.  
49 Stakeholders have included older people themselves, family members and health and  
50 social care professionals, including dementia liaison services, psychologists and care  
51 home management and staff. The older people involved in this study also  
52 subsequently provided feedback on methods for future research.  
53  
54  
55  
56  
57  
58  
59  
60

## Participants and settings

In total, 35 participants collaborated: 17 older people (5 male, 12 female, age range 60-99 years), and 18 roboticists (10 male and 8 female, age range 24-37). Older people were recruited at a supported living complex that houses individuals of and above retirement age within apartments, with a manager present on site. Roboticists were recruited at an away-day event of researchers from a robotics research centre. These included research students, academics and individuals developing and researching robotics and social robots, many within the health and social care field. The researchers were therefore familiar with this field, and the students may represent a next generation of developers.

## Procedure

In both settings, participants gave written informed consent, then formed groups of up to four people. Each group then moved through three interaction stations where participants engaged in free interaction with a selection of robots or toys. Each interaction station was filmed using two separate cameras, and provided a different range of robot/toy features, aesthetics and abilities (Figure 1). Non-interactive toys and devices with varying sophistication were included as comparison to the high sophistication levels of robots such as Paro. Participants spent 10 minutes at each station, with researchers present to assist and answer questions.

Following free interaction with all available robots and toys, participants finally engaged in semi-structured focus group discussions, guided by key questions (table 1), which were informed by previous research (34). Questions were amended, however, to include more features of interest and to ensure relevance with end-users as opposed to care providers. Following completion, participants were debriefed.

**Table 1: Key questions used to guide focus group discussions**

| Key Questions                                                                                                                                                                                                                                                                                                                                                                |
|------------------------------------------------------------------------------------------------------------------------------------------------------------------------------------------------------------------------------------------------------------------------------------------------------------------------------------------------------------------------------|
| 1. Which of the animals did you like? What is it about those animals that makes you like them?                                                                                                                                                                                                                                                                               |
| 2. Thinking of designing a new robot for older people, what possibilities and properties should a suitable pet robot have? (e.g. Look, feel, abilities) <ol style="list-style-type: none"> <li>a. What features and qualities are necessary?</li> <li>b. What features and qualities are desirable?</li> <li>c. Which expressions are important?</li> <li>d. Why?</li> </ol> |
| 3. What possibilities and properties should a suitable pet robot <i>not</i> have?                                                                                                                                                                                                                                                                                            |
| 4. How do you feel about a companion robot speaking? And have a basic conversation?                                                                                                                                                                                                                                                                                          |
| 5. The hedgehog is handmade, what are your thoughts on personalising robots; individuals designing or creating for personal preference of looks, feel and type of animal?                                                                                                                                                                                                    |
| 6. What do you think about how realistic or unrealistic the animal should be? How would you feel about a mythical animal?                                                                                                                                                                                                                                                    |
| 7. How do you feel about life-simulation features?                                                                                                                                                                                                                                                                                                                           |
| 8. Would you fancy having one of these animals yourself to keep, which one would you choose? (for roboticists – which one would you choose for an older person?)                                                                                                                                                                                                             |

Robots starting positions at each station were randomised, from left to right, to avoid introduction of bias, Figure 2 shows an example interaction station. Researchers

1  
2  
3 maintained a conscious effort to keep interaction unbiased, refraining from leading  
4 questions, and restricting their role to introducing animals and responding to  
5 participant questions during the free interactions. The procedure was maintained as  
6  
7  
8  
9  
10  
11  
12  
13  
14  
15  
16  
17  
18  
19  
20  
21  
22  
23  
24  
25  
26  
27  
28  
29  
30  
31  
32  
33  
34  
35  
36  
37  
38  
39  
40  
41  
42  
43  
44  
45  
46  
47  
48  
49  
50  
51  
52  
53  
54  
55  
56  
57  
58  
59  
60

maintained a conscious effort to keep interaction unbiased, refraining from leading questions, and restricting their role to introducing animals and responding to participant questions during the free interactions. The procedure was maintained as much as possible between both settings. Roboticists were asked to think of the target audience of older people when responding to key questions.

## Materials

We used video recording equipment to capture interactions between participants and robots. Note pads were used for researchers to make field notes, further to paper participant information sheets, consent forms and debriefs.

Ethical approval was received from the Faculty of Science and Engineering ethics committee at the University of Plymouth. All participants provided full, written informed consent prior to the study.

## Data Analysis

Discussions at all stations were transcribed verbatim and analysed by two researchers (HB, KE). There were two sets of data for each setting, i) unprompted opinions based on comments and discussions during free interaction with the range of robots and toys, and ii) focus group responses. Both sets of data were analysed separately with NVivo using content analysis to garner emerging themes. Content analysis was selected for

1  
2  
3 inclusion of frequencies of theme occurrence (35), and involves systematic coding and  
4  
5  
6  
7  
8  
9  
10  
11  
12  
13  
14  
15  
16  
17  
18  
19  
20  
21  
22  
23  
24  
25  
26  
27  
28  
29  
30  
31  
32  
33  
34  
35  
36  
37  
38  
39  
40  
41  
42  
43  
44  
45  
46  
47  
48  
49  
50  
51  
52  
53  
54  
55  
56  
57  
58  
59  
60

inclusion of frequencies of theme occurrence (35), and involves systematic coding and categorising of text to garner trends, frequencies and relationships of words in discourse (36). Researchers undertook a process of data immersion, coding, grouping codes, generating categories and reporting, as prescribed by Elo and Kyngas (37).

The results are reported in three sections:

- Section 1 provides the themes arising during content analysis of older peoples free interactions. Section 1 thus provides initial insight into end-user requirements. The emergent themes provide unprompted opinions and depth of understanding towards older peoples design requirements.
- Section 2 focuses on the prominent themes from focus group discussions; the selection of features most commonly discussed by both groups in response to Key Questions (Table 1). These features were assessed for frequency of positive or negative response, to allow numerical comparison of opinions between end-users and developers. Examples of each group's responses are provided.
- Section 3 maps the relationship between older adult's unprompted opinions and their focus group responses, to provide greater confidence in the prompted focus group results.

## RESULTS

### Section 1: Content Analysis of Older Peoples' Free Interaction with the Robots

This section provides an in-depth exploration of themes arising during unprompted, free interactions between older people (OP) and all of the companion robots. This procedure provides an insight into the features and abilities perceived positively and

1  
2  
3 negatively during real-world interaction with a comprehensive range of robots. The  
4  
5 themes arising during analysis of older people interactions were; interactivity,  
6  
7 familiarity, shell design and ownership.  
8  
9

## 10 11 12 **Interactivity**

13  
14 The theme of interactivity emerged on 185 occasions through the codes: *interactivity*,  
15  
16 *speech and talking*, *commanding the robot*, *fun*, *noises* and *interactivity lacking*. This  
17  
18 theme strongly suggested that during live, unprompted interactions, older people  
19  
20 demonstrated preference for interactive devices over non-interactive alternatives. The  
21  
22 results also indicated eye contact, obeying commands and speech could be  
23  
24 improvements on currently available devices.  
25  
26  
27  
28  
29

30  
31 Interactivity elicited positive comments from participants such as “*fascinating*,” (OP15)  
32  
33 and provided a sense of achievement when a device appeared responsive; “*I got the*  
34  
35 *cat to roll over!*” (OP16). Participants demonstrated most enjoyment when robots  
36  
37 appeared reactive to the individual themselves, rather than producing random  
38  
39 movements or sounds; “*fun isn’t it!*” (OP6). In contrast, non-interactive devices  
40  
41 provoked negative responses. The non-interactive Perfect Petzzz dog was described  
42  
43 as “*a bit of a disappointment*,” (OP6) as the dog “*doesn’t do much*” (OP16) which may  
44  
45 become “*boring*” (OP12) as “*you can’t do more than pat its head*” (OP17). Perhaps  
46  
47 surprisingly, participants also underappreciated the interactivity of Paro. The Joy for  
48  
49 All animals were seen as highly interactive, despite their more limited technological  
50  
51 features, while Paro was described as “*on strike*” (OP7) because participants felt it  
52  
53 “*just moves its head*” (OP3, OP1). Participants interacting with Paro sometimes  
54  
55  
56  
57  
58  
59  
60

1  
2  
3 displayed slight envy towards peers interacting with the Joy for All animals, “you’ve  
4  
5 *done more with that cat than I got to do*” (OP11).  
6  
7  
8  
9

10 Despite enjoying the interactivity of available robots, older people also expressed a  
11  
12 desire for command response from robots during free interactions. The commands  
13  
14 each animal received varied. The commands directed at the Joy for All dog were  
15  
16 based on expectations of live dogs, with participants requesting “*high five*” (OP3-4),  
17  
18 “*give paw*” (OP3, OP5, OP8, OP10, OP15, OP17) or “*lie down*” (OP5), on 11  
19  
20 occasions. The Joy for All cat received similar requests including “*can you wag your*  
21  
22 *tail?*” (OP3, OP1, OP8). Miro mainly received directional commands, “*turn around!*”  
23  
24 (OP5-6, OP10-11, OP13, OP15, OP17-18) “*stop, turn, turn left, turn left*” (OP13) and  
25  
26 Pleo received requests to play and eat; “*open wide, open wide, open up, that’s it!*”  
27  
28 (OP13). Participants also repeatedly asked robots to “*look at me*” (OP5, OP7, OP16,  
29  
30 OP15) suggesting facial tracking and eye contact could be a future improvement to  
31  
32 the interactivity of such devices. Further support for this suggestion came from older  
33  
34 people praising robots as “*special*”, particularly Paro and the Joy for All animals,  
35  
36 when they appeared to be “*looking right at*” the participant (OP2, OP4, OP13, OP17).  
37  
38  
39  
40  
41  
42 Most frustration was seen in commanding the non-interactive Perfect Petzzz  
43  
44 sleeping dog, with 15 participants requesting or commanding the dog to “*wake up*”  
45  
46 (OP1-6, OP9-13, OP16-18) or “*open your eyes*” (OP5-6, OP8-9, OP12, OP16).  
47  
48  
49  
50  
51  
52  
53  
54  
55  
56  
57  
58  
59  
60  
Participants reported limited appeal in an animal without responses, suggesting the  
non-interactive dog appeared “*dead*” (OP17).

Participants also demonstrated desire for robot speech during free interactions,  
comparing devices to the resident budgie, and asking “*talk to me good boy*” (OP7)

1  
2  
3 because it would “*be better than talking to myself*” (OP7). Another participant  
4 commented “*it’s the company [sic] I talk to the furniture! [sic] if you live alone you often*  
5 *don’t hear voices*” (OP13), and “*I like to talk to things [sic] I think I just like to hear a*  
6 *voice*” (OP14). Another spoke to Pleo, saying “*I wish you could talk, yes I wish you*  
7 *could talk*” (OP16). Further support came from participant responses to Miro’s  
8 electronic noises, not recognisable as specific animal vocalisations. On 11 occasions,  
9 participants confused the noises with language, repeating, “*what are you saying?*”  
10 (OP5) “*you’re trying to talk aren’t you?*” (OP17) and “*I don’t know if it’s actual words or*  
11 *not*” (OP14). Upon understanding Miro’s noises were not “*actual words*” one  
12 participant described the robot as “*a dead loss*” (OP17). Despite this apparent desire  
13 for verbal responses, participants still initiated conversation with non-speaking  
14 animals; “*what can we call you? We can call you Dino. It’s not very original [sic], Dino,*  
15 *do you want to play again or eat?*” (OP6). This sometimes resulted in disappointment  
16 when devices failed to respond verbally, “*you won’t be much use to me if you don’t*  
17 *talk to me*” (OP9), “*he doesn’t talk back though,*” “*can it hear? It’s got no ears!*” “*If he*  
18 *can’t hear, he can’t talk to me*” (OP16).

## 41 42 **Familiarity**

43  
44 This theme represents participants desire for companion robots to be realistic and  
45 familiar in form, and emerged from codes; *realistic animal, familiarity, comparison to*  
46 *real animals, reminiscence, life-simulation, and toys*. Evidence arose on 71  
47 occasions during older persons unprompted, free interactions.

48  
49 Participants commented on preferring cats or dogs, as what they had “*always had*”  
50 (OP13, OP17) and were “*used to*” (OP8). The realistic, familiar options available also  
51  
52  
53  
54  
55  
56  
57  
58  
59  
60



1  
2  
3 elicited comparisons to real animals, on 25 occasions with the Perfect Petzzz dog,  
4 and Joy for All cat and dog. Participants compared devices to animals they had  
5 known, *“this one’s like Harry” (OP5)* or discussed benefits of robot alternatives as  
6 being *“far easier” (OP3)* because *“you don’t have to take it out [sic] and clean up*  
7 *after it” (OP8)* and *“it won’t malt” (OP4)*. Familiar animals also prompted  
8 reminiscence on 12 occasions, probably due to greater relatability, such as *“I had*  
9 *[sic] Yorkshire terrier, tiny terrier, used to get lagged in the mud” (OP8)*. Only one  
10 occasion was negative, as the participant had experienced *“a dead cat in the water*  
11 *off the pier when I was about 9” (OP5)*.  
12  
13  
14  
15  
16  
17  
18  
19  
20  
21  
22  
23  
24  
25

26 In contrast, unfamiliar forms were perceived by older people as *“a toy” (OP1)* and  
27 more infantilising. During interactions with Miro and Pleo, one participant discussed  
28 preference for *“something, that to me, looks like something we’ve had, like dogs and*  
29 *cats and things, we’ve had dogs and cats you see” (OP10)*. Participants showed  
30 clear preference for familiar forms, and realistic design, over unfamiliar when both  
31 were available; *“that is realistic [dog], we’re not very likely to come into contact with*  
32 *one of them [seal]” (OP5)*. Participants suggested seals were incongruent with their  
33 context, believing seals belong *“on the ice floats” (OP4)* or *“eaten with pepper sauce”*  
34 *(OP4)*. The familiar animals were most often the devices praised for looking  
35 *“realistic” (OP3)*, or behaving in a way that appeared *“very real” (OP5)*.  
36  
37  
38  
39  
40  
41  
42  
43  
44  
45  
46  
47  
48  
49  
50

51 Further to preferring realistic design, the breathing feature of the Perfect Petzzz dog  
52 was well received; *“it’s fascinating to watch him breathing” (OP15)*. It appears any  
53 feature increasing the ‘realness’ of a companion was beneficial, participants reported  
54 life simulation features such as the breathing made the robots look *“living” (OP17)*.  
55  
56  
57  
58  
59  
60

1  
2  
3 This feature was commented on 13 times, and often a source of conversation  
4  
5 between participants, however appeal of the Perfect Petzzz dog was still limited by  
6  
7 lack of interactivity.  
8  
9

## 10 11 12 **Shell design**

13  
14 This theme arose on 89 occasions during older peoples free interactions, through  
15  
16 codes; *realistic animal, physical features, shell-type, favouritism, preference, texture*  
17  
18 and *likeability*. The evidence strongly suggested older people preferred soft, furry  
19  
20 companion robots, but also favoured big eyes. Participants did prefer features  
21  
22 making animals appear more realistic, although this is discussed above.  
23  
24  
25  
26  
27

28  
29 Paro's eyes were specifically commented on positively by six older people. The "*big*  
30  
31 *eyes*" (OP1, OP4) were described as "*cute*" (OP2) and appeared to draw participants  
32  
33 towards the seal; "*ohhh look at your eyes!*" (OP11). Participants also particularly  
34  
35 appreciated Paro's prominent eyelashes; "*ladies will wish they had lashes like him!*"  
36  
37 (OP6). Other large eyes also received praise, such as Furby's animated eyes that  
38  
39 were particularly "*captivating*" (OP16).  
40  
41  
42  
43  
44

45  
46 Older people praised animals with fur for cuddliness and suggested, in response to  
47  
48 non-furry options, that they "*want something [sic] you could smooth and it feels like*  
49  
50 *an animal, you know, like that [Joy for All] cats got fur*" (OP10). On 11 occasions  
51  
52 participants responded negatively to plastic shells of Pleo and Miro, as they did not  
53  
54 "*feel quite as friendly*" (OP11). In contrast, Paro's fur was described as "*lovely*" (OP8)  
55  
56 and "*soft*" (OP11). Participants appeared to acknowledge Paro possessed softer fur  
57  
58 than alternative furry animals, however, the Joy for All cat fur was praised for being  
59  
60

1  
2  
3 less pristine. Participants suggested the cat “*looks a bit bedraggled*” (OP7) which  
4  
5 resulted in time spent brushing and grooming the cat. One participant suggested the  
6  
7 fur looked “*so real*” (OP1) suggesting the longer, shaggier coat felt more congruent  
8  
9 with cat expectations.  
10  
11

## 12 13 14 **Ownership**

15  
16 This theme arose on 30 occasions, through codes; *naming, ownership, and*  
17  
18 *personalisation* and represents older people demonstrating some attachment  
19  
20 towards robots during free interactions.  
21  
22

23  
24  
25 Naming was thought to relate to ownership, as provision of a name to a live animal  
26  
27 occurs with possession, and has been shown in research to relate to a developing  
28  
29 relationship (38). Older people sometimes used names of previous pets, such as  
30  
31 “*Milo*” (OP1) because “*they’ve got a cat called Milo*” (OP3). Other participants chose  
32  
33 generic names, such as “*Fido*” (OP11) or “*Tigger*” (OP4) while some got creative  
34  
35 with names like “*Shandy*” (OP7) because the dog “*is a mixture*” (OP7). Once older  
36  
37 people had allocated a name, it endured throughout their interaction, “*are you*  
38  
39 *wagging your tail for me Shandy?*” (OP7). This tendency to name occurred mostly  
40  
41 with the Joy for All cat and dog.  
42  
43  
44  
45  
46  
47  
48

49 Further evidence for ownership came from a code of the same name. Ten older  
50  
51 people commented on acquiring a robot during free interactions, such as “*do you*  
52  
53 *know, I’d love this [cat], I’d love this in my apartment*” (OP2). Another suggested  
54  
55 about the Joy for All dog that “*the service should have one*” (OP6) with peers  
56  
57 commenting in agreement. Another suggested “*we’ll all go out and buy one now!*”  
58  
59  
60

1  
2  
3 (OP17). Of all occurrences, ownership was only shown towards the Joy for All cat  
4 and dog, suggesting good acceptability of these two devices.  
5  
6  
7  
8  
9

10 We felt personalisation related to ownership, as wanting to adapt a robot for personal  
11 use implies a desire to keep it. Evidence for personalisation was not prolific during  
12 free interactions, with hints of personalisation being desired occurring only twice.  
13  
14

15 One participant enjoyed the Joy for All dog, but requested a larger size as “*I don’t do*  
16 *little doggies*” (OP16). The participant requested it “*look like a golden retriever*”  
17 because “*it’s the only dog we’ve ever known*” (OP16). It is possible evidence was  
18 limited during free interactions as participants were unaware of the possibility.  
19  
20  
21  
22  
23  
24  
25  
26  
27

## 28 **Section 2: Focus Group Results**

29  
30 This section presents the results of the focus groups as a numerical comparison  
31 between end-users and developers, to provide a clear understanding of any  
32 differences between the two groups. The features presented represent the most  
33 prevalent themes during content analysis of responses to Key Questions (Table 1).  
34 For both groups, an overall score was calculated for each feature (n participants  
35 responding positively minus n participants responding negatively). The difference  
36 between roboticists and older people’s opinions for each feature was then calculated.  
37 Examples of focus group responses for comparison are also provided, for greater  
38 depth of understanding.  
39  
40  
41  
42  
43  
44  
45  
46  
47  
48  
49  
50  
51  
52  
53

54 **Table 2: Comparing the number of older people and roboticists providing**  
55 **positive, negative or non-responses for each feature and the resultant level of**  
56 **difference or agreement**  
57  
58  
59  
60

|                             |              | Soft          |           |            |              |           |           | Life      |            |
|-----------------------------|--------------|---------------|-----------|------------|--------------|-----------|-----------|-----------|------------|
|                             |              | Interactivity | Fur       | Talking    | Personalised | Realistic | Familiar  | Mythical  | simulation |
| <b>Older People</b><br>n=17 | Positive     | 15            | 12        | 12         | 15           | 12        | 4         | 1         | 5          |
|                             | Negative     | 0             | 1         | 5          | 1            | 1         | 0         | 5         | 0          |
|                             | None         | 2             | 4         | 0          | 1            | 4         | 13        | 11        | 12         |
|                             | <b>Score</b> | <b>15</b>     | <b>11</b> | <b>7</b>   | <b>14</b>    | <b>11</b> | <b>4</b>  | <b>-4</b> | <b>5</b>   |
| <b>Roboticians</b><br>n=18  | Positive     | 14            | 8         | 2          | 7            | 2         | 1         | 1         | 3          |
|                             | Negative     | 2             | 1         | 13         | 8            | 11        | 10        | 1         | 2          |
|                             | None         | 2             | 9         | 3          | 3            | 5         | 7         | 16        | 13         |
|                             | <b>Score</b> | <b>12</b>     | <b>7</b>  | <b>-11</b> | <b>-1</b>    | <b>-9</b> | <b>-9</b> | <b>0</b>  | <b>1</b>   |
| <b>Score difference</b>     |              | <b>3</b>      | <b>4</b>  | <b>18</b>  | <b>15</b>    | <b>20</b> | <b>13</b> | <b>4</b>  | <b>4</b>   |

Key: green = difference  $\leq 4$ , orange = difference  $\geq 13$

Table 2 compares opinions of older people and roboticists towards design of companion robots specifically for older people. The score differences show the largest dissimilarities in opinions were for realistic aesthetic, robots talking human language, personalisation of robots and familiar form. Older people and roboticists seem to agree on the need for interactivity and soft-fur in response to key questions 1 and 2 (table 1). There also appears to be some agreement between the two groups on inclusion of life-simulation features and mythical design, although generally older people were more positive towards life simulation and more negative towards mythical design. Some participants did not respond to every feature, resulting in lower numbers of responses for some features. Table 2 shows familiarity, life-simulation and mythical design received lower responses, this could suggest these features were less important, and thus participants felt less inclined to comment. However, this could also

1  
2  
3 represent the semi-structured nature of the focus groups, and that realistic, familiar or  
4  
5 mythical design were all discussed in relation to key question 10.  
6  
7  
8  
9  
10  
11  
12  
13  
14  
15  
16  
17  
18

19 The most preferred animal among older people in response to Key Question 8 was  
20 the Joy for All cat, with 9/17 (53%) participants selecting this animal (figure 3). The  
21 second most popular animal was the Joy for All dog. Paro, Miro and the homemade  
22 hedgehog were not selected by any older person. The most preferred animal for  
23 roboticists was Paro (11/18), followed by Pleo the dinosaur, then the homemade  
24 hedgehog. The Joy for All dog and cat, Miro, the Perfect Petzzz sleeping dog and  
25 Furby were not selected by any roboticists, and some roboticists did not select any of  
26 the available animals.  
27  
28  
29  
30  
31  
32  
33  
34  
35  
36  
37  
38  
39  
40  
41

42 **Table 3: Examples of evidence from each group during focus group discussions**  
43

| Theme | Older People | Example Evidence | Robotocists |
|-------|--------------|------------------|-------------|
|-------|--------------|------------------|-------------|

1  
2  
3  
4  
5  
6  
7  
8  
9  
10  
11  
12  
13  
14  
15  
16  
17  
18  
19  
20  
21  
22  
23  
24  
25  
26  
27  
28  
29  
30  
31  
32  
33  
34  
35  
36  
37  
38  
39  
40  
41  
42  
43  
44  
45  
46  
47  
48  
49  
50  
51  
52  
53  
54  
55  
56  
57  
58  
59  
60

|                 |                                                                                                                                                                                                                                                                                                                 |                                                                                                                                                                                                                                                                                                                                                                                                                           |
|-----------------|-----------------------------------------------------------------------------------------------------------------------------------------------------------------------------------------------------------------------------------------------------------------------------------------------------------------|---------------------------------------------------------------------------------------------------------------------------------------------------------------------------------------------------------------------------------------------------------------------------------------------------------------------------------------------------------------------------------------------------------------------------|
| Interactivity   | <p>“If you’re sat there on your own, you want some reaction” (OP6)</p> <p>“That one [Joy for All cat] is almost perfect, but perhaps if you could say, do you want to play, and then it could then do something, a little bit more interactive” (OP13)</p>                                                      | <p>“I think something passive, that doesn’t make a lot of sounds, it could be stressful, too much [sic] You could have a sack that’s warm and purrs” (R3)</p> <p>“I think it should have high level interaction, because it would keep the interaction longer as well, if you just have a pet like this with one or two features, it’s done, it’s limited” (R9)</p>                                                       |
| Soft fur        | <p>“Day to day cleaning, you could wipe over it [Pleo], furry thing would be harder” (OP5)</p> <p>“Fur I think so. The plastic I found very cold, not something you would, sorta, cuddle” (OP13)</p>                                                                                                            | <p>“I don’t think so, because it isn’t cleanable, if you wanted something to cuddle you could just buy a stuffed toy” (R14)</p> <p>“Nice and furry, you could kinda cuddle it” (R18)</p>                                                                                                                                                                                                                                  |
| Talking         | <p>“[animals] don’t talk, there are sounds that creatures make” (OP6)</p> <p>“For older people living on their own in particular, we all talk to ourselves anyway, you don’t feel so stupid if you talk to something that responds to you” (OP13)</p>                                                           | <p>“from a technological point of view, speech should be left out of the equation, especially with elderly people, and people with dementia, they wouldn’t have expressions or fully structured sentences which would get frustrating if the robot didn’t understand” (R1)</p> <p>“I can see the appeal, [sic] a rudimentary conversation might be quite nice, as long as you didn’t feel like a twit doing it” (R11)</p> |
| Personalisation | <p>“If it was knitted, it wouldn’t be able to move its eyes and mouth” (OP5)</p> <p>“It’s quite a good idea, yeah I do, someone who’s got a particular animal” “We were talking about colours, I like that one, she’s always had black cats, It would be nice to have a choice of different colours” (OP13)</p> | <p>“That might ruin the illusion I’d say” “if you’ve eaten like a chicken, if you’ve seen the actual process, you would not feel so good about it [sic], when you see the finished product without knowing how, it’s sometimes better” (R2)</p> <p>“It would be amazing, it would give it a personal touch, it’s like having a</p>                                                                                        |

|                 |                                                                                                                                                                                                                                             |                                                                                                                                                                                                                                                                                                                                                                                                                                             |
|-----------------|---------------------------------------------------------------------------------------------------------------------------------------------------------------------------------------------------------------------------------------------|---------------------------------------------------------------------------------------------------------------------------------------------------------------------------------------------------------------------------------------------------------------------------------------------------------------------------------------------------------------------------------------------------------------------------------------------|
|                 |                                                                                                                                                                                                                                             | new [smartphone] and getting a new cover, people love that" (R10)                                                                                                                                                                                                                                                                                                                                                                           |
| Realistic       | <p>"For someone who's always had animals, they feel that loss, so for them, something realistic that they could interact with" (OP1)</p> <p>"as long as it's got big eyes and attractive I don't mind" (OP17)</p>                           | <p>"It would make more sense" (R1)</p> <p>"No [sic] if it's not realistic, you wouldn't be hoping it would be a real dog so" (R16)</p>                                                                                                                                                                                                                                                                                                      |
| Familiarity     | <p>"because they [cat and dog] are more domesticated animals, whereas a seal you wouldn't have a seal in your home" (OP1)</p> <p>"I think if you'd had a cat or a dog, it would be better to have something you could relate to" (OP12)</p> | <p>"for the elderly it should be something familiar" (R2)</p> <p>"I think because of uncanny valley it doesn't have to be something that we are used too" (R7)</p>                                                                                                                                                                                                                                                                          |
| Mythical        | <p>"That's a generation thing, kids would love it but not here" (OP1)</p> <p>"Maybe in five years time.." (OP16)</p>                                                                                                                        | <p>"I also think something super unrealistic like the Furby would be creepy as well, it's so bizarre you could be turned off by it, it's weird, a baby seal, you're not accustomed to the animal so whatever it does is just cute" (R8)</p> <p>"The mythical Furby looks right because you've got no expectations, so you cannot do it wrong, you cannot break expectations" (R13)</p>                                                      |
| Life simulation | <p>"Warmth under belly to keep your knees warm!" (OP1)</p> <p>"If it was breathing, it would be almost a real cat, and again, it's a soothing thing" (OP14)</p>                                                                             | <p>"I can feel on the dinosaur, coming from an engineering point of view, with all that inside and trouble circulating the air, you can feel it gets warm, but I think that's actually a good thing, that you can feel, it's even more, like lizard like, even more appearing like something" (R6)</p> <p>"The problem is I think it has to be done well, and it's really difficult to do well, it could end up creepy and weird" (R14)</p> |



1  
2  
3  
4  
5  
6  
7  
8 Table 3 provides examples of the different views of older adults and roboticists during  
9 the focus group discussions, further examples can be found in Supplementary File 1.  
10  
11  
12  
13

### 14 **Section 3 – Relationship between Free Interaction and Focus Group Data**

15  
16  
17 This section explores how the themes arising during unprompted, free interaction  
18 support the validity of the prompted focus group results (figure 4).  
19  
20  
21  
22  
23  
24  
25  
26  
27  
28  
29  
30  
31  
32  
33  
34  
35  
36  
37  
38  
39

40 The theme of interactivity arising during free interactions supports the focus group  
41 results above demonstrating all older people who discussed interactivity (15/17,  
42 88.24%) desired this feature for a robot pet. As seen in Section 1, interactivity of the  
43 devices was highly valued by older people during free interactions, with many  
44 participants desiring additional interaction such as obeying commands and talking.  
45 This theme during free interaction thus also supports the focus group theme of talking,  
46 where 12/17 (71%) older people felt positively towards robot speech.  
47  
48  
49  
50  
51  
52  
53  
54  
55  
56

57 The theme of familiarity arising during unprompted interactions supports the focus  
58 group results where all older people who commented (4/17, 24%) preferred familiar  
59  
60

1  
2  
3 forms, and 12/17 (71%) preferred realistic or life-like appearance, with only 1/17 (6%)  
4  
5 older people responding negatively to life-like appearance, meaning 92.31% of  
6  
7 responses were positive. The higher percentage of non-responses to familiarity could  
8  
9 suggest participants felt less strongly about this feature, and thus less inclined to  
10  
11 comment. However, the qualitative results from free interactions would dispute this,  
12  
13 with very strong support arising in favour of a familiar animal, therefore it could  
14  
15 alternatively be suggested participants did not necessarily distinguish between  
16  
17 realistic and familiar, as realistic, unrealistic and mythical were the words used within  
18  
19 the Key Questions.  
20  
21  
22  
23  
24

25 The shell-type theme, and clear preference for soft fur during older peoples' free  
26  
27 interactions, is congruent with focus group results where 12/17 (71%) older people  
28  
29 preferred soft fur, while only 1/17 (6%) disagreed (92% of responses positive). Life  
30  
31 simulation was not discussed at length during free interactions, although the breathing  
32  
33 feature on the dog was well received. This feature also had lower response rates  
34  
35 during focus groups. The lower response rate for this feature could again suggest that  
36  
37 while life-simulation may be desirable, supported through decisive responses (100%  
38  
39 of responses were positive), this feature may be less of a priority, with 12/17 (71%)  
40  
41 older people not providing opinions. Despite limited direct discussion during free  
42  
43 interactions, the potential inclusion of this feature is supported by the familiarity theme,  
44  
45 whereby any aesthetic or technological features increasing the 'realness' of a pet  
46  
47 appeared well received during unprompted free interaction.  
48  
49  
50  
51  
52  
53  
54

55 Personalisation was not highly prevalent during free interaction, however, some  
56  
57 evidence was seen within the ownership theme, with a participant requesting a golden-  
58  
59 retriever design if he were to own one. When raised in the focus groups, 15/17 (88%)  
60

1  
2  
3 older people felt positively towards personalisation, and only 1/17 (6%) provided  
4  
5 opposition (94% of responses were positive). It is possible personalisation garnered  
6  
7 limited discussion during free interactions as participants were unaware it was  
8  
9 possible. The range of suggestions of preferred animals upon proposal of  
10  
11 personalisation however would certainly suggest some benefit to this approach.  
12  
13  
14  
15  
16

## 17 **DISCUSSION**

18  
19 User-centred design is generally cited as beneficial (4, 26); however the extent of  
20  
21 its use in companion robot development is currently minimal. This study has  
22  
23 demonstrated, through direct comparison, the importance of implementing user-  
24  
25 centred design in the development of companion robots targeted at older people, due  
26  
27 to large differences in design preference between end-users and potential developers.  
28  
29 The results therefore justify additional effort for the reportedly difficult process of  
30  
31 integrating user requirements into design (29), and may aid with the challenge of user-  
32  
33 centred design being accepted in practice (26). Some of our roboticists felt user  
34  
35 involvement in development could damage illusions of the robot, perhaps helping  
36  
37 explain the minimal use of this process. However, rather than damaging illusions,  
38  
39 adopting user-centred design may actually ensure devices receive adequate  
40  
41 acceptability to promote use (25). Future development of robots utilising a user-  
42  
43 centred approach may result in more consistent positive outcomes than those  
44  
45 previously reported for Paro (17, 18, 20, 21), whose contradictory results may in-part  
46  
47 result from design features our results suggest are undesirable to end-users.  
48  
49 Implications of improved design, acceptability and use would be significant due to the  
50  
51 reported potential benefits of companion robots for older people, those with dementia  
52  
53 and their family and care team (10-15). Results of our study would suggest strong  
54  
55  
56  
57  
58  
59  
60

1  
2  
3 acceptability and preference of the Joy for All cat and dog, and limited acceptability of  
4  
5 Paro when these more familiar/realistic comparisons are available. This result is  
6  
7 particularly important when considering the lack of available companion robot  
8  
9 comparison studies (39) and apparent selection bias towards Paro in research (9).  
10  
11 Further to highlighting the value of user-centred design, this study provided initial  
12  
13 insight on end-user design requirements.  
14  
15  
16  
17  
18

19  
20 Regarding robot abilities, older people strongly preferred an interactive device, for  
21  
22 the purpose of providing companionship, fun, and reducing loneliness through  
23  
24 responsiveness. Interactivity was also a strong preference for our group of roboticists,  
25  
26 however some raised concerns on over-stimulating older people. Our older adults  
27  
28 displayed little interest towards non-interactive animals, whose lack of responsiveness  
29  
30 appeared frustrating. This disinterest in unresponsive/inactive companions is  
31  
32 congruent with the finding that an 'active' Paro was more engaging than an 'inactive'  
33  
34 Paro (18). While interactivity appears essential, our results demonstrated the  
35  
36 advanced responsivity of Paro may be unnecessary. Despite having fewer  
37  
38 technological abilities, the Joy for All cat was perceived as most interactive. This  
39  
40 appeared to result from a greater range of movements available, including animated  
41  
42 head and legs, rolling-over, blinking and cleaning movements. Therefore, the range  
43  
44 and variety of responses may be more important than the sophistication of sensors a  
45  
46 robot possesses.  
47  
48  
49  
50  
51  
52

53  
54 We also found older adults had continuous interest in the companion robots  
55  
56 understanding and responding to simple commands. Use of commands is only briefly  
57  
58 mentioned in previous literature (32), and our findings appear contrary to the results  
59  
60

1  
2  
3 of Klamer and Allouch (40) who found no evidence for the importance of enjoyment or  
4  
5 playfulness factors among community dwelling older adults. Our group of older people  
6  
7 actively sought playfulness from robots, believing this would sustain enjoyment for  
8  
9 longer. Responsiveness to simple commands such as “paw” could be a consideration  
10  
11 for future robot design. Interestingly, there were fewer command expectations for the  
12  
13 Joy for All cat than other alternatives, perhaps due to a reduced association between  
14  
15 live cats and training versus live dogs. These expectations could be used to support  
16  
17 use of an unfamiliar form such as Paro, whose design was aimed at reducing  
18  
19 expectations (41). However, older people still displayed command expectations for  
20  
21 Pleo, Miro and Paro, (unfamiliar forms), therefore disputing this theory. One could  
22  
23 speculate that the cat’s larger quantity of movements results in a reduced need to  
24  
25 command actions.  
26  
27  
28  
29  
30  
31  
32

33 Older people also positively evaluated potential for human speech from a  
34  
35 companion robot. These results contradict the suggestion that, congruent with the  
36  
37 uncanny valley theory, human acceptability of sounds depends on the realism of the  
38  
39 context (42). Komatsu and Yamada (43) demonstrated participants relate less to an  
40  
41 AIBO dog beeping than a computer emitting an identical sound, perhaps due to  
42  
43 contradiction in context between a dog and a beeping noise. While this would suggest  
44  
45 animal sounds would be most acceptable for animal robots, our results indicated  
46  
47 positive attitudes towards speech capabilities for provision of company. Frennert and  
48  
49 Ostlund (33) found that developers were influenced by stereotypical perceptions of  
50  
51 older people as lonely and fragile, but failed to incorporate requirements of  
52  
53 participating older people into design. Our group of older people thought loneliness  
54  
55 could be eased through devices capable of simple conversation. This could be a user-  
56  
57  
58  
59  
60

1  
2  
3 driven improvement to currently available companion animals should results be  
4 replicated in wider samples. It is possible, however, that this feature will be evaluated  
5 differently with a sample of cognitively impaired older people. Our participants were  
6 cognitively intact and therefore aware of the artificial nature of the robots or toys, older  
7 people with dementia however may find the incongruence of human speech from an  
8 animal less acceptable, this therefore requires further research.  
9  
10  
11  
12  
13  
14  
15  
16  
17  
18

19 Eye contact was a further improvement desired by older people, with our results  
20 demonstrating some disappointment and frustration when robots failed to look towards  
21 the user. Gaze following may increase social relevance of the robot. This may be  
22 particularly true when eye movement is intentional rather than random (44). While the  
23 pre-programmed movements of the Joy for All cat were positively evaluated,  
24 intentional gaze following would perhaps be an improvement for optimal social  
25 companionship. de Graaf et al. (45) noted the importance of improving sociability for  
26 robot acceptance, and therefore this addition of apparent social behaviour could  
27 improve acceptability further.  
28  
29  
30  
31  
32  
33  
34  
35  
36  
37  
38  
39  
40  
41

42 Regarding the outer shell, most older people preferred soft, cuddly fur. Our group of  
43 roboticists generally agreed, although both groups raised concerns regarding hygiene  
44 in comparison to a hard shell. This corroborates previous findings that care providers  
45 preferred soft, cuddly fur on robots aimed at their older service users (34, 46). On the  
46 contrary, other results have reported older people's preference for mechanical design  
47 on a robot (28). These results may reflect the broader range of socially assistive robots  
48 used (machine-like, mechanical, human-like and animal-like robots), however,  
49 generally results implied a robot should indeed be recognisable as robotic (28).  
50  
51  
52  
53  
54  
55  
56  
57  
58  
59  
60

1  
2  
3 Robinson et al. (21) also reported a family member demonstrating stigma towards his  
4 father interacting with soft-toys, suggested a potential gender barrier with soft, cuddly  
5 robots. Our study found no notable difference between males and females. This  
6 support provided directly by older people themselves would strongly suggest soft fur  
7 should be implemented in the design of companion robots aimed at this market.  
8 Providing the optimum tactile characteristics are particularly important considering  
9 evidence suggests touch is one of the most important modalities of interaction for  
10 dementia patients, creating a natural method to engage with animaloid robots (47).  
11  
12  
13  
14  
15  
16  
17  
18  
19  
20  
21  
22  
23

24 Considering the importance of tactile characteristics (46), a further feature for  
25 consideration in future development is life simulation, another capability positively  
26 evaluated by older people, but lacking from current examples including Paro, amongst  
27 others. Our research supports the previously reported (46) assumption of care-  
28 providers that a simulated heartbeat would be a valuable addition to Paro, but  
29 additionally demonstrates that older people themselves also valued life simulation  
30 features, including simulated heartbeat, simulated breathing and the feeling of purring.  
31 Older people even suggested warmth as an additional life-simulation feature. This  
32 result appears congruent with older adults' desire for a realistic, life-like companion.  
33  
34  
35  
36  
37  
38  
39  
40  
41  
42  
43  
44  
45  
46

47 A realistic, familiar animal form was a definite aesthetic requirement for our group of  
48 older people. This was also reflected in their choice of Joy for All cat as their preferred  
49 device, as a familiar, realistic option, with no older people selecting Paro. Previous  
50 research focusing on opinions of care providers revealed criticism towards Pleo for  
51 lack of familiarity (34). In contrast, the intentionally unfamiliar Paro (41) is the most  
52 often utilised companion robot in research (9), and research on older adult perceptions  
53  
54  
55  
56  
57  
58  
59  
60

1  
2  
3 towards robot pets did not produce familiarity as a result (32), however this may result  
4 from the lack of familiar options available for comparison. The end-users in our  
5 research suggested that, additionally to Pleo, Paro was also considered too unfamiliar.  
6  
7 The strongest preference was seen towards the most familiar animals, the Joy for All  
8 cat and dog, for being more relatable and congruent with the contexts in which older  
9 people lived. The unfamiliar forms appeared incongruent and infantilising, perhaps  
10 explaining the tension Lazar et al. (32) noted towards their selection of unfamiliar  
11 animals. This is relevant insofar as some companion robots, such as Paro, are  
12 intentionally designed using an unfamiliar form (a seal in the case of Paro) to avoid  
13 negative schemas, or the robot failing to meet expectations (41). Research suggested  
14 older people complained about the feel and behavior of a robot cat in comparison to  
15 real cats (47). However, this initial research was conducted 19 years ago, and it is  
16 therefore likely that currently available robotic cats are more realistic than the Tama  
17 OMRON Corp cat available at the time. The majority of our roboticists group  
18 responded negatively to a familiar animal design due to expectations people would  
19 hold of animals they were accustomed to, consistent with the thinking behind Paro  
20 (41), and unsurprisingly selected Paro as their preferred companion robot. It is likely  
21 the roboticists appreciate the advanced technical capabilities of Paro, but this study  
22 would suggest such sophistication may be unnecessary for this group of end-users.  
23 Similarly, roboticists did not feel realistic appearance was appropriate. While the  
24 thinking behind designing Paro as an unfamiliar animal seems logical (41), this theory  
25 seems to resonate poorly with end-users, having potential negative impact on  
26 preference.  
27  
28  
29  
30  
31  
32  
33  
34  
35  
36  
37  
38  
39  
40  
41  
42  
43  
44  
45  
46  
47  
48  
49  
50  
51  
52  
53  
54  
55  
56  
57  
58  
59  
60



1  
2  
3 The preference for realistic and familiar robots may result from relatability, with older  
4 people perhaps having personal experience of cats and dogs, due to prevalence of  
5 ownership of these species (48). Familiar animals may provide recognisable potential  
6 for a loving relationship. Even individuals without personal pet ownership experience  
7 will have likely witnessed others with pets, and therefore the familiar form of a dog or  
8 cat is symbolic of that potential bond and relationship. The tendency for our group of  
9 older people to name the Joy for All cat and dog more often than alternatives suggests  
10 familiarity may additionally help facilitate a sense of ownership. Thus, our results imply  
11 that rather than being problematic (41), memories and schemas of familiar animals  
12 may actually be beneficial. A further implication of familiar companion robots relates  
13 to reminiscence theory, which suggests benefits of reminiscence for older people  
14 including decreased depression (49). Reminiscence therapy uses memories, feelings  
15 and thoughts from the past to facilitate pleasure (50). Evidence of reminiscence was  
16 found in our study, and seems congruent with this theory, as memories of past pets  
17 and animals were shared with positive affect. It is therefore possible familiar  
18 companion robots would have additional wellbeing benefits, particularly for individuals  
19 with dementia.  
20  
21  
22  
23  
24  
25  
26  
27  
28  
29  
30  
31  
32  
33  
34  
35  
36  
37  
38  
39  
40  
41  
42  
43  
44

45 The possibility of personalisation was also positively perceived by older people and  
46 thus could be a consideration for future robot design. Personalisation has been  
47 mentioned in previous research (28), and identified by Heerink et al. (34), who  
48 commented on different users responding differently to different robots, but has not  
49 been explored directly with end-users. Our group of older people positively evaluated  
50 a more person-centred approach to robot aesthetics, praising the potential to  
51 interchange robot 'skins' to match personal preference. It is possible personalised  
52  
53  
54  
55  
56  
57  
58  
59  
60

1  
2  
3 robots would be more acceptable than a single design for all users. This could alleviate  
4  
5 some disparity in response to Paro, as seen in previous RCT research (22).  
6  
7  
8  
9

10 In contrast, our group of roboticists underestimated the value of personalisable  
11  
12 aesthetics, and failed to predict older people's desire for human speech and life-  
13  
14 simulation features. The transcript evidence suggests roboticists had an awareness of  
15  
16 Mori's uncanny valley theory (51). This is not surprising given their field of interest,  
17  
18 and it is possible the uncanny valley theory and related literature had influenced  
19  
20 roboticists perceptions on robot design, swaying roboticists to favour unrealistic and  
21  
22 unfamiliar forms, and to undervalue life-simulation features that would undoubtedly  
23  
24 increase further the realistic impression of a robot.  
25  
26  
27  
28  
29

30 One limitation of our study was the short interaction time of ten minutes at each station,  
31  
32 providing initial preferences. Research has suggested acceptance should be  
33  
34 measured over longer periods of use, allowing for familiarisation and more informed  
35  
36 attitudes towards the device, which may be more predictive of actual use (52). Future  
37  
38 longitudinal research is therefore required exploring how these initial preferences  
39  
40 develop over time, to assess any differences in loss of engagement, or wellbeing  
41  
42 outcomes. Our interaction period is however longer than, for example, previous  
43  
44 research, where participants only interacted with each robot for one minute (34).  
45  
46  
47  
48  
49

50  
51 We did also use smaller group sizes than previous research (34), which may have  
52  
53 limited influence of social desirability bias or group dynamics. The small sample size,  
54  
55 and small numbers of responses to some features during focus groups, is a further  
56  
57 limitation. However, we have conducted a larger-scale comparison that will further  
58  
59  
60

1  
2  
3 these results. The use of qualitative, free interaction transcriptions also increases  
4 confidence in focus group results, even where response numbers were low, as  
5 preferences were often evident through unprompted interaction.  
6  
7  
8  
9

10  
11  
12 A further consideration with the current study is that the sample of older people was  
13 recruited from a retirement complex. While this recruitment strategy allowed insight  
14 into this sample, the generalisability of these views to care home residents is limited.  
15  
16  
17 The larger-scale study of the same nature has been conducted within a range of care  
18 homes to address this issue. The current research does however suggest there is  
19 acceptability of such devices among a more independent sample. This is in contrast  
20 to previous research which implied more independent older people felt 'too able' to  
21 use robots (28). Thus, there may be a market among this more independent sample  
22 that has previously been underestimated.  
23  
24  
25  
26  
27  
28  
29  
30  
31  
32  
33

34  
35 An important strength of the current study is the active participation of older people  
36 themselves. Some previous research exploring design features of companion robots  
37 for older people focused mainly on care provider opinions (28, 46). Our research has  
38 provided support for some previously identified features, but furthered this evidence  
39 base through identification of design features previously unthought-of by care  
40 providers. A further strength includes the use of a range of robots and toys, some  
41 specifically designed for older people, unlike previous related literature (32), providing  
42 a varied array of features of interest and allowing older people to provide truly informed  
43 opinions.  
44  
45  
46  
47  
48  
49  
50  
51  
52  
53  
54  
55  
56  
57

## 58 **Conclusion**

59  
60

1  
2  
3 This study has provided empirical support for the necessity and value of incorporating  
4 user-centred design in the development of companion robots targeted at older people.  
5  
6 While user-centred design has been recommended previously, there has been little  
7  
8 direct evidence to support the gravity of its requirement. Our results demonstrate stark  
9  
10 differences in preferences and requirement between older people and roboticists,  
11  
12 suggesting engaging the end-user in the design and development of companion robots  
13  
14 is essential. This study also began the process of researching companion robot design  
15  
16 with end-users themselves. The older people in our sample have suggested soft fur,  
17  
18 interactivity and big 'cute' eyes, as being priority features on a robot. Older people also  
19  
20 strongly suggested the robot should take the form of a realistic, familiar animal, raising  
21  
22 questions surrounding the design of the most well researched companion robot, Paro.  
23  
24 Further desirable functions were also identified that are not currently included as  
25  
26 standard on companion robots, such as eye-contact, life-simulation features,  
27  
28 personalisation, obeying commands and the potential for interactive language.  
29  
30  
31  
32  
33  
34  
35  
36  
37  
38  
39

40 **Funding Statement** H. Bradwell's PhD was funded by a PhD studentship from the  
41  
42 School of Nursing and Midwifery at the University of Plymouth. The robots used in this  
43  
44 study were loaned from the School of Nursing and Midwifery and the Ehealth  
45  
46 Productivity and Innovation in Cornwall and the Isle of Scilly (EPIC) project, which is  
47  
48 part funded by the European Regional Development Fund (ERDF). All of the above  
49  
50 were 'general funds' to fund study in this area of endeavour. There were no specific  
51  
52 funds for this project and there is no commercial or other interest from the funders in  
53  
54 the findings of this study.  
55  
56

### 57 **Competing Interest**

58  
59  
60

1  
2  
3 The authors declare that they have no competing interests.  
4

### 5 **Author Contributions**

6  
7 All authors read and approved the manuscript.

8  
9  
10 HB designed the study, performed data collection, transcribed, analysed and  
11 interpreted results and lead on producing the manuscript.  
12

13  
14  
15 KE transcribed data, analysed and interpreted results and aided in production of the  
16 original manuscript.  
17

18  
19 RW supervised the project, provided expertise and advice towards the study  
20 conception and design, discussed results and substantively revised the manuscript.  
21

22  
23  
24 ST supervised the project, provided expertise and advice towards the study  
25 conception and design, discussed results and substantively revised the manuscript.  
26

27  
28  
29 RJ oversaw participant recruitment and data collection, supervised the project,  
30 provided expertise and advice towards the study conception and design, discussed  
31 results and substantively revised the manuscript.  
32

### 33 **Acknowledgements**

34  
35  
36 Mrs M Jones, for knitting and kindly supplying the hedgehog used in this research.

37  
38 Miss D Hubbard for assistance with participant recruitment.

39  
40  
41 Kirsty Langstaff for assistance with data collection.

42  
43  
44 Jake Gibson Shaw-Sutton for assistance with data collection and recording  
45 equipment.  
46

47  
48  
49 Khaian Marsh for assistance with data collection and recording equipment.

50  
51  
52 The Ehealth Productivity and Innovation in Cornwall and the Isle of Scilly (EPIC)  
53 project, which is part funded by the European Regional Development Fund (ERDF),  
54 for the loan of some of the robots used in this research.  
55

### 56 **Data Sharing**

57  
58  
59  
60

1  
2  
3 The datasets generated and analysed during this study are available at the Open  
4  
5 Science Framework using the following link:

6  
7 [https://osf.io/kps2w/?view\\_only=12ec0a445086403db685c3b41e1e3127](https://osf.io/kps2w/?view_only=12ec0a445086403db685c3b41e1e3127)

## 10 **References**

- 11  
12  
13 1. Abdi J, Al-Hindawi A, Ng T, et al. Scoping review on the use of socially  
14 assistive robot technology in elderly care. *BMJ Open* 2018;8:e018815.  
15 doi:0.1136/bmjopen-2017-018815.
- 16  
17 2. Garcon L, Khasnabis C, Walker L, et al. Medical and Assistive Health  
18 Technology: Meeting the Needs of Aging Populations. *Gerontologist* 2016;56(Suppl  
19 2):S293-302. doi:10.1093/geront/gnw005 [published Online First: 18 March 2016].
- 20  
21 3. Broadbent E, Stafford R, MacDonald B. Acceptance of Healthcare Robots for  
22 the Older Population: Review and Future Directions. *International Journal of Social  
23 Robotics* 2009;1(4):319. doi: 10.1007/s12369-009-0030-6 [published Online First: 3  
24 October 2009].
- 25  
26 4. Moyle W, Jones C, Pu L, et al. Applying user-centred research design and  
27 evidence to develop and guide the use of technologies, including robots, in aged  
28 care. *Contemporary Nurse* 2018;54(1):1-3. doi:10.1080/10376178.2017.1438057  
29 [published Online First: 3 May 2018].
- 30  
31 5. Steptoe A, Deaton A, Stone AA. Subjective wellbeing, health, and ageing. *The  
32 Lancet* 2015;385(9968):640-8. doi:10.1016/S0140-6736(13)61489-0 [published  
33 Online First: 6 November 2014].
- 34  
35 6. Farrand P, Matthews J, Dickens C, et al. Psychological interventions to  
36 improve psychological well-being in people with dementia or mild cognitive  
37 impairment: systematic review and meta-analysis protocol. *BMJ Open*  
38 2016;6(1):e009713. doi:10.1136/bmjopen-2015-009713
- 39  
40 7. Broekens J, Heerink M, Rosendal H. Assistive social robots in elderly care: A  
41 review. *Gerontechnology* 2009;8(2):94-103. doi:10.4017/gt.2009.08.02.002.00
- 42  
43 8. Moyle W, Cooke M, Beattie E, et al. Exploring the Effect of Companion  
44 Robots on Emotional Expression in Older Adults With Dementia: A Pilot Randomized  
45 Controlled Trial. *Journal of Gerontological Nursing* 2013;39(5):46-53.  
46 doi:10.3928/00989134-20130313-03 [published Online First: 22 March 2013].
- 47  
48 9. Pu L, Moyle W, Jones C, et al. The Effectiveness of Social Robots for Older  
49 Adults: A Systematic Review and Meta-Analysis of Randomized Controlled Studies.  
50 *The Gerontologist* 2019;59(1):e37-e51. doi: 10.1093/geront/gny046.
- 51  
52 10. Joranson N, Pedersen I, Rokstad AM, et al. Effects on Symptoms of Agitation  
53 and Depression in Persons With Dementia Participating in Robot-Assisted Activity: A  
54  
55  
56  
57  
58  
59  
60

- 1  
2  
3  
4 Cluster-Randomized Controlled Trial. *J Am Med Dir Assoc* 2015;16(10):867-73.  
5 doi:10.1016/j.jamda.2015.05.002 [published Online First: 18 June 2015].  
6  
7 11. Wada K, Shibata, T., Saito, T., et al. Psychological and Social Effects of One  
8 Year Robot Assisted Activity on Elderly People at a Health Service Facility for the  
9 Aged. *Proceedings of the 2005 IEEE International Conference on Robotics and*  
10 *Automation* 2005; Barcelona, Spain: IEEE. doi:10.1109/ROBOT.2005.1570535  
11  
12 12. Saito T, Shibata T, Wada K, et al. Relationship between interaction with the  
13 mental commit robot and change of stress reaction of the elderly. *Proceedings 2003*  
14 *IEEE International Symposium on Computational Intelligence in Robotics and*  
15 *Automation* 2003; Kobe, Japan, p. 119-24. doi: 10.1109/CIRA.2003.1222074  
16  
17 13. Liang A, Piroth I, Robinson H, et al. A Pilot Randomized Trial of a Companion  
18 Robot for People With Dementia Living in the Community. *Journal of the American*  
19 *Medical Directors Association* 2017;18(10):871-8. doi:10.1016/j.jamda.2017.05.019  
20 [published Online First: 28 June 2017].  
21  
22 14. Petersen S, Houston, S., Qin, H., et al. The Utilization of Robotic Pets in  
23 Dementia Care. *Journal of Alzheimer's Disease* 2017;55:569-74. doi:10.3233/JAD-  
24 160703 [published Online First: 1 October 2016].  
25  
26 15. Robinson H, MacDonald B, Broadbent E. Physiological effects of a  
27 companion robot on blood pressure of older people in residential care facility: a pilot  
28 study. *Australasian Journal On Ageing* 2015;34(1):27-32. doi:10.1111/ajag.12099  
29 [published Online First: 25 December 2013].  
30  
31 16. Soler MV, Aguera-Ortiz L, Rodriguez JO, et al. Social robots in advanced  
32 dementia. *Frontiers in Aging Neuroscience* 2015;7:133.  
33 doi:10.3389/fnagi.2015.00133 [published Online First: 3 September 2015]  
34  
35 17. Misselhorn C, Pompe, U., Stapleton, M. Ethical Considerations Regarding the  
36 Use of Social Robots in the Fourth Age. *GeroPsych* 2013;26:121-33. doi:  
37 10.1024/1662-9647/a000088 [published Online First: 15 May 2013].  
38  
39 18. Moyle W, Jones CJ, Murfield JE, et al. Use of a Robotic Seal as a Therapeutic  
40 Tool to Improve Dementia Symptoms: A Cluster-Randomized Controlled Trial. *J Am*  
41 *Med Dir Assoc* 2017;18(9):766-73. doi:10.1016/j.jamda.2017.03.018 [published  
42 Online First: 2 August 2017].  
43  
44 19. Robinson H, Macdonald B, Kerse N, et al. The psychosocial effects of a  
45 companion robot: a randomized controlled trial. *J Am Med Dir Assoc* 2013;14(9):661-  
46 7. doi: 10.1016/j.jamda.2013.02.007 [published Online First: 30 March 2013].  
47  
48 20. Thodberg K, Sorensen LU, Christensen JW, et al. Therapeutic effects of dog  
49 visits in nursing homes for the elderly. *Psychogeriatrics* 2016;16(5):289-97.  
50 doi:10.1111/psyg.12159 [published Online First: 29 October 2015].  
51  
52  
53  
54  
55  
56  
57  
58  
59  
60

21. Robinson H, MacDonald BA, Kerse N, et al. Suitability of Healthcare Robots for a Dementia Unit and Suggested Improvements. *J Am Med Dir Assoc* 2013;14(1):34-40. doi:10.1111/psyg.12159 [published Online First: 29 October 2015].
22. Moyle W, Jones C, Murfield J, et al. Using a therapeutic companion robot for dementia symptoms in long-term care: reflections from a cluster-RCT. *Aging & mental health* 2019;23(3):329-336. doi:10.1080/13607863.2017.1421617 [published Online First: 28 December 2017].
23. Odetti L, Anerdi G, Barbieri MP, et al. Preliminary experiments on the acceptability of animaloid companion robots by older people with early dementia. *Proceedings of the 29th Annual International Conference of the IEEE EMBS* 2007;1816-1819. Lyon, France. doi:10.1109/IEMBS.2007.4352666
24. Tamura T, Yonemitsu S, Itoh A, et al. Is an Entertainment Robot Useful in the Care of Elderly People With Severe Dementia? *The Journals of Gerontology: Series A* 2004;59(1):M83-M5. doi:10.1093/gerona/59.1.M83
25. Heerink M, Kröse B, Evers V, et al. Assessing Acceptance of Assistive Social Agent Technology by Older Adults: the Almere Model. *International Journal of Social Robotics* 2010;2(4):361-75. doi:10.1007/s12369-010-0068-5 [published Online First: 4 September 2010].
26. Chammas A, Quaresma M, Mont'Alvão C. A Closer Look on the User Centred Design. *Procedia Manufacturing* 2015;3:5397-404. doi:10.1016/j.promfg.2015.07.656 [published Online First: 23 October 2015].
27. Orrell M, Hancock GA, Liyanage KC, et al. The needs of people with dementia in care homes: the perspectives of users, staff and family caregivers. *Int Psychogeriatr* 2008;20(5):941-51. doi:10.1017/S1041610208007266 [published Online First: 17 April 2008].
28. Pino M, Boulay M, Jouen F, et al. "Are we ready for robots that care for us?" Attitudes and opinions of older adults toward socially assistive robots. *Front Aging Neurosci* 2015;7:141. doi:10.3389/fnagi.2015.00141 [published Online First: 23 July 2015].
29. Green A, Hüttenrauch H, Norman M, et al. User centered design for intelligent service robots. *Proceedings 9th IEEE International Workshop on Robot and Human Interactive Communication* 2000;161-166. Osaka, Japan. doi:10.1109/ROMAN.2000.892488
30. Sandoval E, Penaloza C. Children's knowledge and expectations about robots: A survey for future user-centered design of social robots. 7th ACM/IEEE International Conference on Human-Robot Interaction (HRI); 2012;107-108. Boston, MA.



- 1  
2  
3  
4 31. Wu YH, Cristancho-Lacroix V, Fassert C, et al. The Attitudes and Perceptions  
5 of Older Adults With Mild Cognitive Impairment Toward an Assistive Robot. *J Appl*  
6 *Gerontol* 2016;35(1):3-17. doi:10.1177/0733464813515092 [published Online First: 9  
7 January 2014].  
8  
9 32. Lazar A, Thompson H, Piper AM, et al. Rethinking the Design of Robotic Pets  
10 for Older Adults. *Proceedings of the 2016 ACM Conference on Designing Interactive*  
11 *Systems* 2016; Brisbane, QLD, Australia. doi:10.1145/2901790.2901811  
12  
13 33. Frennert S, Östlund, B. Review: Seven Matters of Concern of Social Robotics  
14 and Older People. *International Journal of Social Robotics* 2014;6(2):299-310. doi:  
15 10.1007/s12369-013-0225-8 [published Online First: 29 January 2014].  
16  
17 34. Heerink M, Albo-Canals J, Valenti-Soler M, et al. Exploring Requirements and  
18 Alternative Pet Robots for Robot Assisted Therapy with Older Adults with Dementia.  
19 *Proceedings of the 5th International Conference on Social Robotics* 2018;104-15.  
20 Bristol, UK. doi:10.1007/978-3-319-02675-6\_11  
21  
22 35. Vaismoradi M, Turunen H, Bondas T. Content analysis and thematic analysis:  
23 Implications for conducting a qualitative descriptive study. *Nursing & Health*  
24 *Sciences* 2013;15(3):398-405. doi: 10.1111/nhs.12048 [published Online First: 11  
25 March 2013].  
26  
27 36. Mayring P. Qualitative Content Analysis. *Forum: Qualitative Social Research*  
28 2000;1(2). <http://www.qualitative-research.net/index.php/fqs/article/view/1089/2385>  
29 (accessed 3 March 2019).  
30  
31 37. Elo S, Kyngäs H. The qualitative content analysis process. *Journal of*  
32 *Advanced Nursing* 2008;62(1):107-15. doi:10.1111/j.1365-2648.2007.04569.x  
33 [published Online First: 18 March 2008].  
34  
35 38. Bayne K. Development of the Human-Research Animal Bond and Its Impact  
36 on Animal Well-being. *ILAR Journal* 2002;43(1):4-9. doi:10.1093/ilar.43.1.4  
37  
38 39. Kachouie R, Sedighadeli S, Khosla R, et al. Socially Assistive Robots in  
39 Elderly Care: A Mixed-Method Systematic Literature Review. *International Journal of*  
40 *Human-Computer Interaction* 2014;30(5):369-93.  
41 doi:10.1080/10447318.2013.873278 [published Online First 1 April 2014].  
42  
43 40. Klamer T, Allouch SB. Acceptance and use of a social robot by elderly users  
44 in a domestic environment. *2010 4th International Conference on Pervasive*  
45 *Computing Technologies for Healthcare* 2010;22-25. Munich, Germany.  
46 doi:10.4108/ICST.PERVASIVEHEALTH2010.8892  
47  
48 41. Shibata T, Wada K. Robot therapy: a new approach for mental healthcare of  
49 the elderly - a mini-review. *Gerontology* 2011;57(4):378-86. doi:10.1159/000319015  
50 [published Online First: 15 July 2010].  
51  
52  
53  
54  
55  
56  
57  
58  
59  
60

- 1  
2  
3  
4 42. Jones T, Lawson S, Mills D. Interaction with a zoomorphic robot that exhibits  
5 canid mechanisms of behaviour. *2008 IEEE International Conference on Robotics*  
6 *and Automation* 2008;2128-2133. Pasadena, CA.  
7  
8 doi:10.1109/ROBOT.2008.4543521
- 9  
10 43. Komatsu T, Yamada S. How Does the Agents' Appearance Affect Users'  
11 Interpretation of the Agents' Attitudes: Experimental Investigation on Expressing the  
12 Same Artificial Sounds From Agents With Different Appearances. *International*  
13 *Journal of Human-Computer Interaction* 2011;27(3):260-279.  
14  
15 doi:10.1080/10447318.2011.537209 [published Online First: 2 February 2011].
- 16  
17 44. Abubshait A, Wiese E. You Look Human, But Act Like a Machine: Agent  
18 Appearance and Behavior Modulate Different Aspects of Human–Robot Interaction.  
19 *Front Psychol* 2017;8(1393). doi:10.3389/fpsyg.2017.01393 [published Online First  
20 23 August 2017].
- 21  
22 45. de Graaf MMA, Ben Allouch S, van Dijk JAGM. Why Would I Use This in My  
23 Home? A Model of Domestic Social Robot Acceptance. *Human–Computer*  
24 *Interaction* 2017;34(2):115-73. doi:10.1080/07370024.2017.1312406 [published  
25 Online First: 21 July 2017].
- 26  
27 46. Jung MM, van der Leij L, Kelders SM. An Exploration of the Benefits of an  
28 Animallike Robot Companion with More Advanced Touch Interaction Capabilities for  
29 Dementia Care. *Frontiers in ICT* 2017;4:1-11. doi:10.3389/fict.2017.00016 [published  
30 Online First: 26 June 2017].
- 31  
32 47. Shibata T, Tanie K. Influence of a priori knowledge in subjective interpretation  
33 and evaluation by short-term interaction with mental commit robot. *Proceedings 2000*  
34 *IEEE/RSJ International Conference on Intelligent Robots and Systems* 2000;169-174  
35 Takamatsu, Japan. doi:10.1109/IROS.2000.894600
- 36  
37 48. Murray JK, Browne WJ, Roberts MA, et al. Number and ownership profiles of  
38 cats and dogs in the UK. *Veterinary Record* 2010;166(6):163. doi: 10.1136/vr.b4712  
39 [published Online First: 6 February 2010].
- 40  
41 49. Hsieh HF, Wang JJ. Effect of reminiscence therapy on depression in older  
42 adults: a systematic review. *International Journal of Nursing Studies* 2003;40(4):335-  
43 45. doi:10.1016/S0020-7489(02)00101-3 [published Online First: 25 February 2003].
- 44  
45 50. Syed Elias SM, Neville C, Scott T. The effectiveness of group reminiscence  
46 therapy for loneliness, anxiety and depression in older adults in long-term care: A  
47 systematic review. *Geriatric Nursing* 2015;36(5):372-80.  
48  
49 doi:10.1016/j.gerinurse.2015.05.004 [published Online First: 19 June 2015].
- 50  
51 51. Mori M, MacDorman KF, Kageki N. The Uncanny Valley [From the Field].  
52 *IEEE Robotics & Automation Magazine* 2012;19(2):98-100.  
53  
54 doi:10.1109/MRA.2012.2192811  
55  
56  
57  
58  
59  
60

1  
2  
3  
4 52. Wu YH, Wrobel J, Cornuet M, et al. Acceptance of an assistive robot in older  
5 adults: a mixed-method study of human–robot interaction over a 1-month period in  
6 the Living Lab setting. *Clinical Interventions in Aging* 2014;9:801-11.  
7  
8 doi:10.2147/CIA.S56435  
9  
10  
11  
12

## 13 **Figure Legends**

14  
15  
16 **Figure 1: Robots and toys at each interaction station, and the associated**  
17  
18 **features for comparison**

19  
20  
21 **Figure 2: Interaction Station 2**

22  
23 **Figure 3: Choice of robot/toy for use with older people, shown by participant**  
24  
25 **group**

26  
27  
28 **Figure 4: Mapping the relationship between older people’s unprompted**  
29 **opinions and focus group themes**  
30  
31  
32  
33  
34  
35  
36  
37  
38  
39  
40  
41  
42  
43  
44  
45  
46  
47  
48  
49  
50  
51  
52  
53  
54  
55  
56  
57  
58  
59  
60

1  
2  
3  
4  
5  
6  
7  
8  
9  
10  
11  
12  
13  
14  
15  
16  
17  
18  
19  
20  
21  
22  
23  
24  
25  
26  
27  
28  
29  
30  
31  
32  
33  
34  
35  
36  
37  
38  
39  
40  
41  
42  
43  
44  
45  
46  
47  
48  
49  
50  
51  
52  
53  
54  
55  
56  
57  
58  
59  
60

| Station                                                                                                                                     | Animal robot/toy                                                                                             | Range of features for comparison                                                                                                                                                                                  |
|---------------------------------------------------------------------------------------------------------------------------------------------|--------------------------------------------------------------------------------------------------------------|-------------------------------------------------------------------------------------------------------------------------------------------------------------------------------------------------------------------|
| 1 – All soft-fur, differing levels of interactivity, familiar and unfamiliar options                                                        |  <p>Paro</p>                | <ul style="list-style-type: none"> <li>• Unfamiliar</li> <li>• Not life-like</li> <li>• Interactive</li> <li>• Animal noises</li> <li>• No life-simulation</li> <li>• Soft-fur</li> </ul>                         |
|                                                                                                                                             |  <p>Joy for All dog</p>     | <ul style="list-style-type: none"> <li>• Familiar</li> <li>• Life-like</li> <li>• Interactive</li> <li>• Animal noises</li> <li>• Life-simulation (heart beat)</li> <li>• Soft-fur</li> </ul>                     |
|                                                                                                                                             |  <p>Joy for All cat</p>     | <ul style="list-style-type: none"> <li>• Familiar</li> <li>• Life-like</li> <li>• Interactive</li> <li>• Animal noises</li> <li>• Life-simulation (purring)</li> <li>• Soft-fur</li> </ul>                        |
| 2 – Interactivity vs soft-fur, interactive devices have plastic shells, soft-furry dog is non-interactive. Familiar and unfamiliar options. |  <p>Miro</p>                | <ul style="list-style-type: none"> <li>• Unfamiliar</li> <li>• Not life-like</li> <li>• Interactive</li> <li>• Non-animal noises</li> <li>• No life-simulation</li> <li>• Hard-shell</li> </ul>                   |
|                                                                                                                                             |  <p>Pleo rb</p>             | <ul style="list-style-type: none"> <li>• Unfamiliar</li> <li>• Not life-like</li> <li>• Interactive</li> <li>• Non-animal noises</li> <li>• No life-simulation</li> <li>• Soft-plastic shell</li> </ul>           |
|                                                                                                                                             |  <p>Perfect Petzz Dog</p> | <ul style="list-style-type: none"> <li>• Familiar</li> <li>• Life-like</li> <li>• Non-interactive</li> <li>• No noises</li> <li>• Life-simulation (breathing)</li> <li>• Soft-fur</li> </ul>                      |
| 3 – Mythical, unfamiliar option, human speech, completely inert option. Personalisable option.                                              |  <p>Furby</p>             | <ul style="list-style-type: none"> <li>• Unfamiliar</li> <li>• Not life-like (mythical)</li> <li>• Interactive</li> <li>• Non-animal noises (speech)</li> <li>• No life-simulation</li> <li>• Soft-fur</li> </ul> |
|                                                                                                                                             |  <p>Hedgehog</p>          | <ul style="list-style-type: none"> <li>• Unfamiliar</li> <li>• Not life-like</li> <li>• Non-interactive</li> <li>• No noises</li> <li>• No life-simulation</li> <li>• Soft-fur</li> </ul>                         |

Figure 1: Robots and toys at each interaction station, and the associated features for comparison

90x234mm (300 x 300 DPI)

1  
2  
3  
4  
5  
6  
7  
8  
9  
10  
11  
12  
13  
14  
15  
16

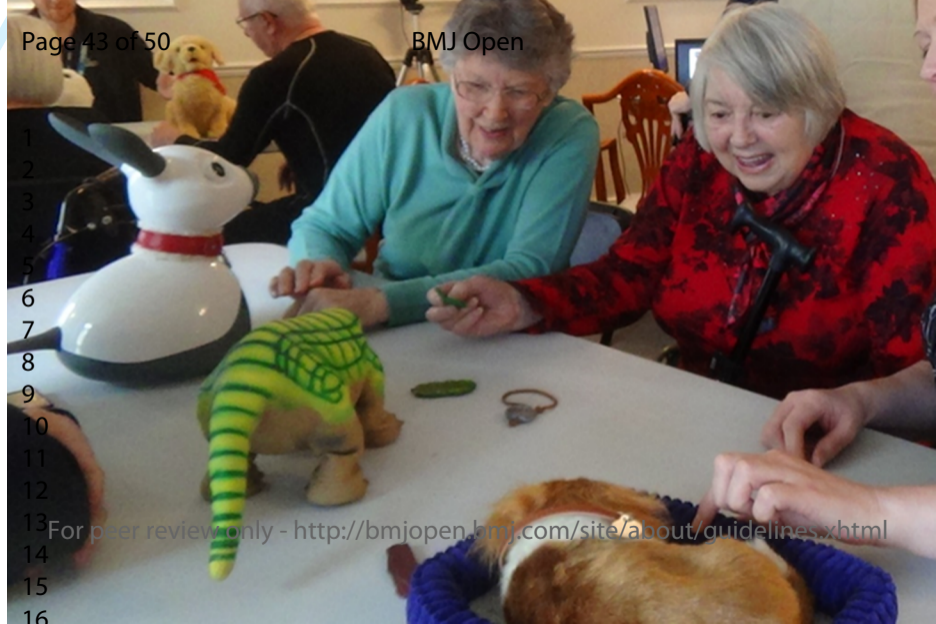

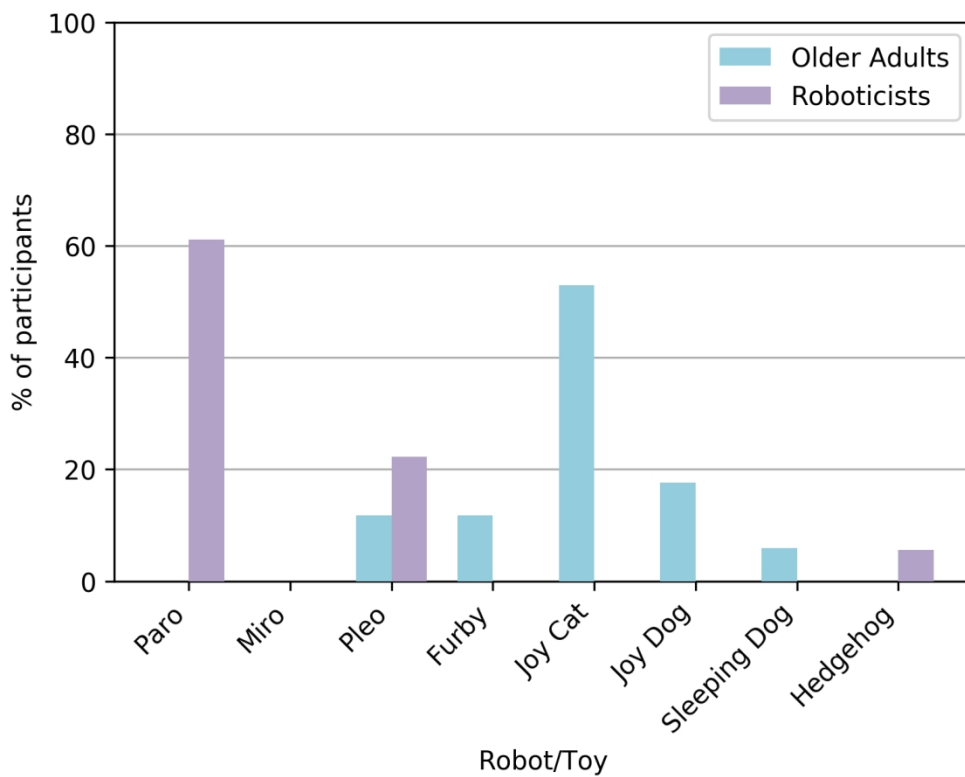

Figure 3: Choice of robot/toy for use with older people, shown by participant group

137x109mm (300 x 300 DPI)

1  
2  
3  
4  
5  
6  
7  
8  
9  
10  
11  
12  
13  
14  
15  
16  
17  
18  
19  
20  
21  
22  
23  
24  
25  
26  
27  
28  
29  
30  
31  
32  
33  
34  
35  
36  
37  
38  
39  
40  
41  
42  
43  
44  
45  
46  
47  
48  
49  
50  
51  
52  
53  
54  
55  
56  
57  
58  
59  
60

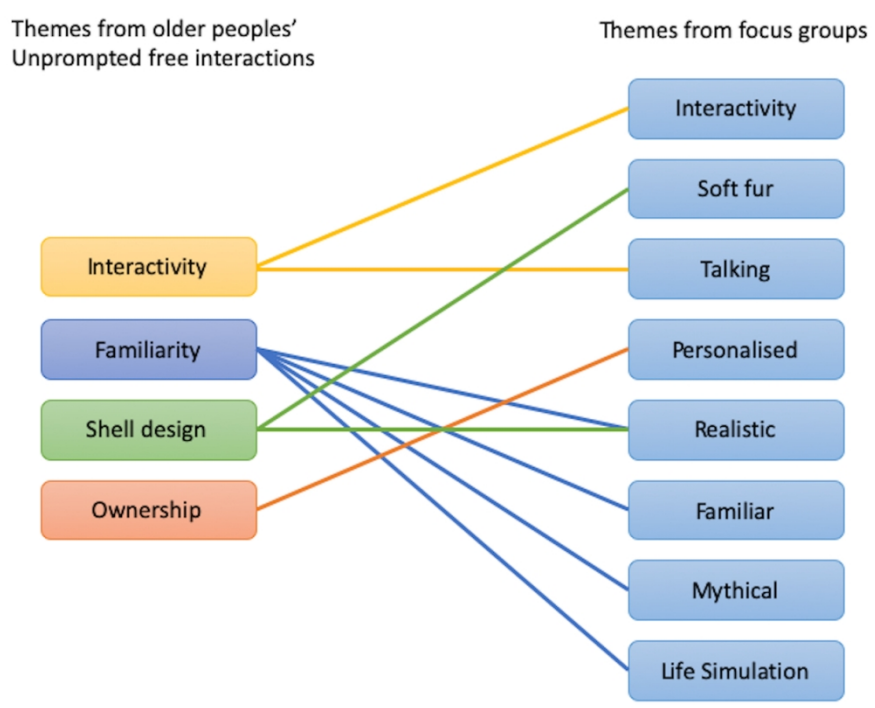

Figure 4: Mapping the relationship between older people's unprompted opinions and focus group themes

119x90mm (300 x 300 DPI)

## Supplementary Materials

Table 1: Further examples of older people's and roboticists responses during focus group discussions.

| Theme         | Older People                                                                                                                                                                                                                                                                                                                                                                                                                                                                                               | Example Evidence                                                                                                                                                                                                                                                                                                                                                                                                                                                                                                                                                                                                                                                                               | Robotocists |
|---------------|------------------------------------------------------------------------------------------------------------------------------------------------------------------------------------------------------------------------------------------------------------------------------------------------------------------------------------------------------------------------------------------------------------------------------------------------------------------------------------------------------------|------------------------------------------------------------------------------------------------------------------------------------------------------------------------------------------------------------------------------------------------------------------------------------------------------------------------------------------------------------------------------------------------------------------------------------------------------------------------------------------------------------------------------------------------------------------------------------------------------------------------------------------------------------------------------------------------|-------------|
| Interactivity | <p>“it [Pleo] interacted more so you could spend loads of time just playing” (OP4)</p> <p>“If you're sat there on your own, you want some reaction” (OP6)</p> <p>“He [Joy for All dog] had more interaction, he was doing more of less what I wanted him to do” (OP15)</p> <p>“I'd like it to respond to me” (OP7)</p> <p>“That one [Joy for All cat] is almost perfect, but perhaps if you could say, do you want to play, and then it could then do something, a little bit more interactive” (OP13)</p> | <p>“The more sensors it has, and the more functionality it has the better, so they wouldn't get bored so easily, more it interacts” (R1)</p> <p>“I think something passive, that doesn't make a lot of sounds, it could be stressful, too much [sic] You could have a sack that's warm and purrs” (R3)</p> <p>“I think it should have high level interaction, because it would keep the interaction longer as well, if you just have a pet like this with one or two features, it's done, it's limited” (R9)</p> <p>“I don't know, thinking of older people, I like the idea of a cat, it could just be on your lap and purrs, it doesn't have to look at you, cats don't generally” (R18)</p> |             |
| Soft fur      | <p>“Day to day cleaning, you could wipe over it [Pleo], furry thing would be harder” (OP5)</p> <p>“Soft furry face, the dinosaur interaction was good but it's still like dragging your hand over rubber” (OP6)</p> <p>“you can't stroke plastic” (OP10)</p> <p>“Furry, the seal [Paro] was lovely” (OP12)</p>                                                                                                                                                                                             | <p>“It should be soft” (R4)</p> <p>“Definitely have the fluffiness of the seal, around the same level of interactivity” (R5)</p> <p>“The dinosaur is cute but the texture is horrific” (R8)</p> <p>“The fur is attractive” (R10)</p> <p>“I don't think so, because it isn't cleanable, if you wanted something to</p>                                                                                                                                                                                                                                                                                                                                                                          |             |



1  
2  
3  
4  
5  
6  
7  
8  
9  
10  
11  
12  
13  
14  
15  
16  
17  
18  
19  
20  
21  
22  
23  
24  
25  
26  
27  
28  
29  
30  
31  
32  
33  
34  
35  
36  
37  
38  
39  
40  
41  
42  
43  
44  
45  
46  
47  
48  
49  
50  
51  
52  
53  
54  
55  
56  
57  
58  
59  
60

---

“Fur I think so. The plastic I found very cold, not something you would, sorta, cuddle” (OP13)

cuddle you could just buy a stuffed toy” (R14)

“if you’re having an animal, it has to have animal fur” (OP14)

“Nice and furry, you could kinda cuddle it” (R18)

---

Talking

“Yes, because there’s a lot of time in your flat on your own, just having something to interact with” (OP1)

“from a technological point of view, speech should be left out of the equation, especially with elderly people, and people with dementia, they wouldn’t have expressions or fully structured sentences which would get frustrating if the robot didn’t understand” (R1)

“It might be nice to have a conversation” “If you said to it what’s your name, it would be nice if it could” (OP3)

“[animals] don’t talk, there are sounds that creatures make” (OP6)

“If you’re going for animals, then I don’t think speech is important [sic] yeah animal sounds” (R2)

“If you went in the front door, if it just said sorta, hello! That would be nice” (OP8)

“I think it is important that the robot is honest, with what it understands, it shouldn’t pretend to understand more than it actually understands, which is the case with Pepper, you get frustrated” (R3)

“Picking up something like that and talking, it could be good” (OP11)

“For older people living on their own in particular, we all talk to ourselves anyway, you don’t feel so stupid if you talk to something that responds to you” (OP13)

“It actually gets annoying because it’s repetitive, there is this boundary, where if you’ve interacted for five minutes.... It gets annoying.” (R6)

“I’m not sure, I’ve read about these Japanese and American ones that you can have a whole conversation with, highly sophisticated, but there’s no understanding at all” (OP16)

“People with advanced dementia, it’s really hard to interact with” (R7)

“No, if you make it talk there are a thousand ways to make it talk creepy as well, sounds would be better” (R9)

“I can see the appeal, [sic] a rudimentary conversation might be quite nice, as long as you didn’t feel like a twit doing it” (R11)

“It would take away from the intelligence of the thing” (R15)

---

Personalisation

---

1  
2  
3  
4  
5  
6  
7  
8  
9  
10  
11  
12  
13  
14  
15  
16  
17  
18  
19  
20  
21  
22  
23  
24  
25  
26  
27  
28  
29  
30  
31  
32  
33  
34  
35  
36  
37  
38  
39  
40  
41  
42  
43  
44  
45  
46  
47  
48  
49  
50  
51  
52  
53  
54  
55  
56  
57  
58  
59  
60

“not everyone likes a dog, or there’s a particular colour they want” (OP1)

“I think that’s brilliant” (OP3)

“Yes it would be nice to have a squirrel” (OP4)

“If it was knitted, it wouldn’t be able to move its eyes and mouth” (OP5)

“Yeah, different ones, a Persian cat” (OP11)

“It’s quite a good idea, yeah I do, someone who’s got a particular animal”  
“We were talking about colours, I like that one, she’s always had black cats, It would be nice to have a choice of different colours” (OP13)

“If you had someone in mind, so and so really liked black cats” (OP17)

“That might ruin the illusion I’d say” “if you’ve eaten like a chicken, if you’ve seen the actual process, you would not feel so good about it [sic], when you see the finished product without knowing how, it’s sometimes better” (R2)

“would create love and contact and proximity” (R5)

“People get more attached to it because they created it” (R6)

“I’m not sure if it’s a little patronising” (R7)

“It would be amazing, it would give it a personal touch, it’s like having a new [smartphone] and getting a new cover, people love that” (R10)

“my mum has a cat, she gets quite lonely, but if you had her make a fake cat, it just wouldn’t work” (R14)

“it could take away from the magic of the thing” (R15)

Realistic

“For someone who’s always had animals, they feel that loss, so for them, something realistic that they could interact with” (OP1)

“yeah realistic” (OP9)

“For older people, stick to cats and dogs” (OP12)

“I would prefer life like” (OP11)

“It’s better to have something that’s familiar, and real” (OP16)

“as long as it’s got big eyes and attractive I don’t mind” (OP17)

“It would make more sense” (R1)

“I think it matters less how it looks” (R3)

“I think it could not be so realistic, because (inaudible) expectations” (R9)

“As long as they’re animals, I don’t see an issue with it being realistic or non-realistic” (R11)

“I’m not sure it does, if anything the cat is too real without looking quite right” (R13)

1  
2  
3  
4  
5  
6  
7  
8  
9  
10  
11  
12  
13  
14  
15  
16  
17  
18  
19  
20  
21  
22  
23  
24  
25  
26  
27  
28  
29  
30  
31  
32  
33  
34  
35  
36  
37  
38  
39  
40  
41  
42  
43  
44  
45  
46  
47  
48  
49  
50  
51  
52  
53  
54  
55  
56  
57  
58  
59  
60

---

“I feel like it has to look cute but that doesn’t necessarily mean it has to look realistic” (R15)

“No it can be whatever, if it’s not realistic, you wouldn’t be hoping it would be a real dog so” (R16)

---

### Familiarity

“because they [cat and dog] are more domesticated animals, whereas a seal you wouldn’t have a seal in your home” (OP1)

“for older people stick to cats and dogs, like, might not know what a squirrel is perhaps” (OP10)

“I think if you’d had a cat or a dog, it would be better to have something you could relate to” (OP12)

“It’s better to have something that’s familiar” (OP16)

“for the elderly it should be something familiar” (R2)

“interactivity is more important, you are not interacting with these animals by looking [sic]” “I don’t think it has to be recognisable, it’s more important how it feels, the movements, sounds, purring, but you could put it in a Pokemon” (R3)

“I think because of uncanny valley it doesn’t have to be something that we are used too” (R7)

“a baby seal, you’re not accustomed to the animal so whatever it does is just cute [sic] you’re not accustomed to it” (R8)

“We’re accustomed to dogs and cats and maybe a fake dog or cat seems to be kind of creepy, but Paro, I’m not accustomed to seals” (R9)

“The [Joy for All] dog doesn’t do what it is expected to do, it doesn’t run around or get up like a dog does, I think because people don’t have expectations of what a seal does, they would imagine that’s what it would do, so with the other’s it would cause frustration they didn’t do what was expected” (R15)

“I think we don’t really know what a seal is or does, so you kind of imagine that’s what it would do, where as the others you have some expectations of which could frustrate you” (R17)

---

### Mythical

---

|    |                 |  |
|----|-----------------|--|
| 1  |                 |  |
| 2  |                 |  |
| 3  |                 |  |
| 4  |                 |  |
| 5  |                 |  |
| 6  |                 |  |
| 7  |                 |  |
| 8  |                 |  |
| 9  |                 |  |
| 10 |                 |  |
| 11 |                 |  |
| 12 |                 |  |
| 13 |                 |  |
| 14 |                 |  |
| 15 |                 |  |
| 16 |                 |  |
| 17 |                 |  |
| 18 |                 |  |
| 19 |                 |  |
| 20 |                 |  |
| 21 |                 |  |
| 22 |                 |  |
| 23 |                 |  |
| 24 | Life simulation |  |
| 25 |                 |  |
| 26 |                 |  |
| 27 |                 |  |
| 28 |                 |  |
| 29 |                 |  |
| 30 |                 |  |
| 31 |                 |  |
| 32 |                 |  |
| 33 |                 |  |
| 34 |                 |  |
| 35 |                 |  |
| 36 |                 |  |
| 37 |                 |  |
| 38 |                 |  |
| 39 |                 |  |
| 40 |                 |  |
| 41 |                 |  |
| 42 |                 |  |
| 43 |                 |  |
| 44 |                 |  |
| 45 |                 |  |
| 46 |                 |  |
| 47 |                 |  |
| 48 |                 |  |
| 49 |                 |  |
| 50 |                 |  |
| 51 |                 |  |
| 52 |                 |  |
| 53 |                 |  |
| 54 |                 |  |
| 55 |                 |  |
| 56 |                 |  |
| 57 |                 |  |
| 58 |                 |  |
| 59 |                 |  |
| 60 |                 |  |

“That’s a generation thing, kids would love it but not here” (OP1)

“That [Furby] is just a head, not one like that” “I want it to be more like an animals” (OP10)

“the mythical one is suitable for a child” (OP13)

“I wouldn’t want a mythical one at this time” (OP15)

“Maybe in five years time..” (OP16)

“I also think something super unrealistic like the Furby would be creepy as well, it’s so bizarre you could be turned off by it, it’s weird, a baby seal, you’re not accustomed to the animal so whatever it does is just cute” (R8)

“The mythical Furby looks right because you’ve got no expectations, so you cannot do it wrong, you cannot break expectations” (R13)

“Warmth under belly to keep your knees warm!” (OP1)

“Yes I like the Purring” (OP2)

“Make you feel comforted” (OP13).

“If it was breathing, it would be almost a real cat, and again, it’s a soothing thing” (OP14)

“It would [sic] make them [older people] want to pet it more” (R2)

“I can feel on the dinosaur, coming from an engineering point of view, with all that inside and trouble circulating the air, you can feel it gets warm, but I think that’s actually a good thing, that you can feel, it’s even more, like lizard like, even more appearing like something” (R6)

“The problem is I think it has to be done well, and it’s really difficult to do well, it could end up creepy and weird” (R14)

# BMJ Open

## Companion robots for older people: the importance of user-centred design demonstrated through observations and focus groups comparing preferences of older people and roboticists in South West England.

|                                 |                                                                                                                                                                                                                                                                                                                                                                                              |
|---------------------------------|----------------------------------------------------------------------------------------------------------------------------------------------------------------------------------------------------------------------------------------------------------------------------------------------------------------------------------------------------------------------------------------------|
| Journal:                        | <i>BMJ Open</i>                                                                                                                                                                                                                                                                                                                                                                              |
| Manuscript ID                   | bmjopen-2019-032468.R1                                                                                                                                                                                                                                                                                                                                                                       |
| Article Type:                   | Original research                                                                                                                                                                                                                                                                                                                                                                            |
| Date Submitted by the Author:   | 05-Sep-2019                                                                                                                                                                                                                                                                                                                                                                                  |
| Complete List of Authors:       | Bradwell, Hannah; University of Plymouth, Faculty of Health and Human Sciences<br>Edwards, Katie; University of Plymouth, Faculty of Health and Human Sciences<br>Winnington, Rhona; Auckland University of Technology<br>Thill, Serge; Radboud University Donders Institute for Brain Cognition and Behaviour<br>Jones, Ray; Plymouth University, Faculty of Health, Education, and Society |
| <b>Primary Subject Heading</b>: | Geriatric medicine                                                                                                                                                                                                                                                                                                                                                                           |
| Secondary Subject Heading:      | Geriatric medicine, Health informatics, Mental health, Patient-centred medicine, Qualitative research                                                                                                                                                                                                                                                                                        |
| Keywords:                       | GERIATRIC MEDICINE, Dementia < NEUROLOGY, Health informatics < BIOTECHNOLOGY & BIOINFORMATICS, PUBLIC HEALTH, BIOTECHNOLOGY & BIOINFORMATICS                                                                                                                                                                                                                                                 |
|                                 |                                                                                                                                                                                                                                                                                                                                                                                              |

SCHOLARONE™  
Manuscripts

1  
2  
3 **Title:** Companion robots for older people: the importance of user-centred design  
4 demonstrated through observations and focus groups comparing preferences of  
5 older people and roboticists in South West England.  
6  
7  
8  
9

10  
11  
12 **Authors:** Bradwell, H. L<sup>1\*</sup>, Edwards, K. J<sup>1.</sup>, Winington, R<sup>1,2.</sup>, Thill, S<sup>3.</sup> and Jones, R.  
13 B<sup>1.</sup>  
14  
15

16  
17 <sup>1</sup> Faculty of Health and Human Sciences, University of Plymouth, Plymouth, Devon,  
18 UK  
19

20  
21  
22 <sup>2</sup> Auckland University of Technology, 90 Akorange Drive, Northcote, Auckland, NZ.  
23

24  
25 <sup>3</sup> Donders Institute for Brain, Cognition, and Behaviour, Radboud University,  
26 Nijmegen 6525 HR, The Netherlands  
27  
28  
29

30  
31  
32 \* Corresponding author: hannah.bradwell@plymouth.ac.uk, Academic Office (S06)  
33 Knowledge Spa, Royal Cornwall Hospital Treliske, Truro, Cornwall, UK, TR1 3HD,  
34 tel: 07975927341  
35  
36

37  
38  
39 katie.edwards@plymouth.ac.uk, rhona.winington@aut.ac.nz, s.thill@donders.ru.nl,  
40 ray.jones@plymouth.ac.uk  
41  
42  
43  
44  
45

46 Orcid Numbers:

47  
48 H. Bradwell: 0000-0002-9103-1069  
49

50 K. Edwards: 0000-0001-6212-6010  
51

52 R. Jones: 0000-0002-2963-3421  
53

54 S. Thill: 0000-0003-1177-4119  
55

56 R. Winington: 0000-0002-6504-2856  
57  
58  
59  
60

Main Text: 6259

## Abstract

### Objectives:

Companion robots, such as Paro, may reduce agitation and depression for older people with dementia. However, contradictory research outcomes suggest robot design is not always optimal. While many researchers suggest user-centred design is important, there is little evidence on the difference this might make. Here, we aimed to assess its importance by comparing companion robot design perceptions between older people (end-users) and roboticists (developers).

### Design

Older people and roboticists interacted with 8 companion robots or alternatives at two separate events in groups of 2-4 people. Interactions were recorded, participants' comments and observations were transcribed and content analysed. Subsequently, each group participated in focus groups on perceptions of companion robot design. Discussions were recorded, transcribed and content analysed.

### Participants and Settings

Seventeen older people (5 male, 12 female, ages 60-99) at a supported living retirement complex, and 18 roboticists (10 male, 8 female, ages 24-37) at a research centre away-day.

### Results

We found significant differences in design preferences between older people and roboticists. Older people desired soft, furry, interactive animals that were familiar and realistic, while unfamiliar forms were perceived as infantilising. By contrast, most roboticists eschewed familiar and realistic design, thinking

1  
2  
3 unfamiliar forms better suited older people. Older people also expressed desire  
4 for features not seen as important by developers. A large difference was seen  
5 in attitude towards ability to talk: 12/17 (71%) older people but only 2/18 (11%)  
6 roboticists requested speech. Older people responded positively towards life-  
7 simulation features, eye contact, robot personalisation and obeying commands,  
8 features undervalued by roboticists. These differences were reflected in  
9 preferred device, with “Joy for All” cat chosen most often by older people, while  
10 roboticists most often chose Paro.  
11  
12  
13  
14  
15  
16  
17  
18  
19  
20

## 21 **Conclusions**

22  
23 The observed mis-alignment of opinion between end-users and developers on  
24 desirable design features of companion robots demonstrates the need for user-  
25 centred design during development.  
26  
27  
28  
29  
30

31  
32 **Keywords:** Social robots, companion robots, acceptability, Paro, dementia,  
33 older people, gerontology, healthcare, social care, user-centered design  
34  
35  
36  
37  
38

## 39 **Strengths and limitations of this study**

- 40  
41
- 42 • Novel direct comparison between older people (end-users) and roboticists  
43 (developers).
  - 44 • The participation of older people themselves, contrasts with previous research  
45 using care provider opinions as proxy.
  - 46 • The range of robots and toys, some specifically designed for older people,  
47 extends previous studies with a limited array of robot features.
  - 48 • The short interaction time between participants and robots of ten minutes  
49 allowed limited time for familiarity with devices.
- 50  
51  
52  
53  
54  
55  
56  
57  
58  
59  
60



- Small sample size (although in-depth qualitative analysis does allow for increased confidence in results and smaller group size may have limited influence of social desirability bias or group dynamics).

## BACKGROUND

Life expectancy, and thus proportion of the population at retirement age or above, is increasing worldwide (1). As human function deteriorates with age (2), this creates a greater demand for services (3) while the numbers of health and social care workers decreases (1), putting pressure on health and social care resources (4). Steptoe et al. (5) suggested a growing need for research on maintaining wellbeing: while supporting physical functioning is often addressed, the psychological health of the ageing population has received less attention (6). Assistive robotics, whether rehabilitation or social robots (7), could help in this respect and alleviate some pressure on health and social care resources (3).

Here, we consider companion robots – a subset of social robots often designed congruent with animal aesthetics and behaviours (7, 8) that alleviate issues of traditional animal assisted therapy (9), including reducing risks for the animals themselves (9, 10). A prominent example is Paro, the robot seal (10). Research has suggested numerous benefits of interacting with Paro, including reduced agitation and depression in dementia (11, 12), more adaptive stress response (13), reduced care provider burden (13), and significantly improved affect and communication between dementia patients and day care staff (14). Paro may additionally reduce psychoactive and analgesic medication use (15), and even decrease blood pressure (16).

1  
2  
3 These positive results have however been questioned (17). A comparison between an  
4 active Paro and an inactive one found benefits of the active robot were limited to  
5 engagement (18). One study (19) found no significant improvement for depression  
6 (seeing a significant decrease only for loneliness); another (20) compared live dog  
7 visits to Paro sessions over 6 weeks, and found no improvement for depression with  
8 either intervention. Research assessing suitability of Paro for a dementia unit  
9 suggested it required adaptations; for example, its vocalisations can be distressing (21).  
10 Finally, a large randomised controlled trial (RCT) found considerable variation in  
11 responses to Paro (22).  
12  
13  
14  
15  
16  
17  
18  
19  
20  
21  
22  
23  
24  
25

26 While this disparity may result from individual variability, it is also possible robot design  
27 factors may be impairing wider acceptance. Similar differences have been observed  
28 for other devices; for example, research on AIBO has both shown good acceptability  
29 (23), and found that it encouraged less interaction than a soft toy (24). Meanwhile, a  
30 review of acceptability towards robots used in aged care suggests a number of robots  
31 have failed (3).  
32  
33  
34  
35  
36  
37  
38  
39  
40  
41

42 The Almere model of acceptability of social robots among older people strongly  
43 suggests acceptability can impact intention to use, and therefore actual use of a device  
44 (25). Furthermore, using robots in contexts they were not designed for can perpetrate  
45 negative perceptions of them and reduce acceptability (4), which may explain some of  
46 the conflicting results on robot companions. User-centred design, in general, thus  
47 requires designers to have a deep understanding of those they design for, and to  
48 involve them in all stages of the process (26).  
49  
50  
51  
52  
53  
54  
55  
56  
57  
58  
59  
60

1  
2  
3 Considering perceived requirement can vary between stakeholder groups (27), as can  
4 technology acceptance (28), design requirements likely differ between varied groups  
5 of end-users, for example those with physical impairments (29), children (30), or older  
6 people. Research should thus be specific to the aim of each robotic system. Generally,  
7 integrating user requirements and experiences into design can be difficult (29). One  
8 challenge noted by Chammas et al. (26) is the acceptance, recognition and  
9 incorporation of user-centred design in practice. Therefore, considering potential  
10 additional effort required, evidence establishing the value of this approach might help  
11 encourage designers to adopt this type of methodology.  
12  
13  
14  
15  
16  
17  
18  
19  
20  
21  
22  
23  
24  
25

26 While little appears to be currently known about how older people perceive robots (31),  
27 one study explored meaning behind robotic pets with 41 independent older people  
28 (32), finding that robotic pets could provide social entertainment and interactions.  
29 While functional support was appealing, the fiction of robotic comfort was a potential  
30 tension (32). Participants reported preference for soft fur and suggested play features  
31 as an improvement, currently absent from available companion robots. A limitation  
32 was the use of unfamiliar, often brightly coloured, child-orientated pets, restricting the  
33 range of features participants could inform perceptions on.  
34  
35  
36  
37  
38  
39  
40  
41  
42  
43  
44  
45

46 More generally, while older people and people with dementia are implicated in  
47 companion robot design, they are often not involved (33), even given a clearly  
48 identified need for ensuring devices adequately meet the needs of the end-users (4).  
49 Instead, older people are often assigned stereotypical needs (33). When they are  
50 involved, it is usually through care providers, and at the end of the design process  
51 (32).  
52  
53  
54  
55  
56  
57  
58  
59  
60

1  
2  
3  
4  
5 Here, we therefore investigate any notable differences in opinion between 'robot-  
6 users' and 'robot-creators' regarding the design of companion robots and provide initial  
7 insights into older peoples' design requirements. The different perceptions between  
8 designers and end-users we document also demonstrate the importance of user-  
9 centred design.  
10  
11  
12  
13  
14  
15  
16  
17

## 18 **METHODS**

### 21 **Design**

22 This study was one of many sub-studies forming a doctoral collaborative-action-  
23 research (CAR) project. We conducted observations of roboticists and older people  
24 separately interacting with a variety of robots, providing a comprehensive range of  
25 features for comparison. Both groups then participated in focus group discussions  
26 informed by their interaction experience.  
27  
28  
29  
30  
31  
32  
33  
34  
35  
36  
37

### 38 **Patient and public involvement**

39 Due to the wider projects' CAR approach, key stakeholders have been continually  
40 involved in designing studies forming this doctoral project. Stakeholders have included  
41 older people, family members, and health and social care professionals, including  
42 dementia liaison services, psychologists and care home management and staff. The  
43 older people involved in this study subsequently provided feedback on methods for  
44 future research.  
45  
46  
47  
48  
49  
50  
51  
52  
53  
54  
55

### 56 **Participants and settings**

1  
2  
3 In total, 35 participants collaborated: 17 older people (5 male, 12 female, age range  
4 60-99 years), and 18 roboticists (10 male, 8 female, age range 24-37). Older people  
5 were recruited at a supported living complex that houses individuals of and above  
6 retirement age within apartments, with a manager present on site. Roboticists were  
7 recruited at an away-day event of researchers from a robotics research centre. These  
8 included research students, academics, and individuals developing and researching  
9 robotics and social robots, many within the health and social care field. The  
10 researchers were therefore familiar with this field, and the students may represent a  
11 next generation of developers.  
12  
13  
14  
15  
16  
17  
18  
19  
20  
21  
22  
23  
24  
25

## 26 **Procedure**

27  
28 In both settings, participants gave written informed consent, then formed groups of up  
29 to four people. Each group moved through three interaction stations where participants  
30 engaged in free interaction with a selection of robots or toys. Each station provided a  
31 different range of robot/toy features, aesthetics and abilities (Figure 1), and was filmed  
32 using two cameras. Non-interactive toys and devices with varying sophistication were  
33 included as comparison to the high sophistication levels of robots such as Paro.  
34  
35  
36  
37  
38  
39  
40  
41  
42  
43  
44  
45  
46  
47  
48  
49  
50  
51  
52  
53  
54  
55  
56  
57  
58  
59  
60  
Participants spent 10 minutes at each station, with researchers present to assist and  
answer questions.

After free interaction with all available robots and toys, participants engaged in semi-structured focus group discussions, guided by Key Questions (Table 1). Questions were informed by previous research (34), amended only to include more features of interest and ensure relevance with end-users as opposed to care providers. Finally, participants were debriefed.

**Table 1: Key questions used to guide focus group discussions**

| Key Questions                                                                                                                                                                                                                                                                                                                                                                |
|------------------------------------------------------------------------------------------------------------------------------------------------------------------------------------------------------------------------------------------------------------------------------------------------------------------------------------------------------------------------------|
| 1. Which of the animals did you like? What is it about those animals that makes you like them?                                                                                                                                                                                                                                                                               |
| 2. Thinking of designing a new robot for older people, what possibilities and properties should a suitable pet robot have? (e.g. Look, feel, abilities) <ol style="list-style-type: none"> <li>a. What features and qualities are necessary?</li> <li>b. What features and qualities are desirable?</li> <li>c. Which expressions are important?</li> <li>d. Why?</li> </ol> |
| 3. What possibilities and properties should a suitable pet robot <i>not</i> have?                                                                                                                                                                                                                                                                                            |
| 4. How do you feel about a companion robot speaking? And having a basic conversation?                                                                                                                                                                                                                                                                                        |
| 5. The hedgehog is handmade, what are your thoughts on personalising robots; individuals designing or creating for personal preference of looks, feel and type of animal?                                                                                                                                                                                                    |
| 6. What do you think about how realistic or unrealistic the animal should be? How would you feel about a mythical animal?                                                                                                                                                                                                                                                    |
| 7. How do you feel about life-simulation features?                                                                                                                                                                                                                                                                                                                           |
| 8. Would you fancy having one of these animals yourself to keep, which one would you choose? (for roboticists – which one would you choose for an older person?)                                                                                                                                                                                                             |

Robots starting positions at each station (see Figure 2 for an example) were randomised, from left to right, to avoid introduction of bias. Researchers maintained a conscious effort to keep interaction unbiased, refraining from leading questions, and

1  
2  
3 restricting their role to introducing animals and answering questions during free  
4 interactions. The procedure was maintained as much as possible between both  
5  
6 settings. Roboticists were asked to think of the target audience of older people when  
7  
8 responding to Key Questions.  
9  
10

## 11 12 13 14 **Materials**

15  
16 In addition to video recordings, field notes, paper participant information sheets,  
17  
18 consent forms and debriefs were collected.  
19  
20  
21

22  
23 Ethical approval was received from the Faculty of Science and Engineering ethics  
24  
25 committee at the University of Plymouth. All participants provided full, written  
26  
27 informed consent prior to the study.  
28  
29  
30

## 31 32 33 **Data Analysis**

34  
35 Discussions at all stations were transcribed verbatim and analysed by two researchers  
36  
37 (HB, KE). There were two sets of data for each setting, i) unprompted opinions based  
38  
39 on comments and discussions during free interaction with the range of robots and toys,  
40  
41 and ii) focus group responses. Both sets of data were analysed separately with NVivo  
42  
43 using content analysis to garner emerging themes. Content analysis was selected for  
44  
45 inclusion of frequencies of theme occurrence (35), and involves systematic coding and  
46  
47 categorising of text to garner trends, frequencies and relationships of words in  
48  
49 discourse (36). Researchers undertook a process of data immersion, coding, grouping  
50  
51 codes, generating categories and reporting, as prescribed by Elo and Kyngas (37).  
52  
53  
54  
55  
56  
57

58 The results are reported in three sections:  
59  
60

- Section 1 provides the themes arising during content analysis of older peoples free interactions, giving initial insight into end-user requirements.
- Section 2 focuses on the themes from focus group discussions and features most commonly discussed by both groups in response to Key Questions (Table 1).
- Section 3 maps the relationship between older people's unprompted opinions and their focus group responses.

## RESULTS

### Section 1: Content Analysis of Older Peoples' Free Interaction with the Robots

This section provides an in-depth exploration of themes, both positive and negative, arising during unprompted, free interactions between older people (OP) and the comprehensive range of companion robots. These themes were: interactivity, familiarity, shell design and ownership.

#### Interactivity

The interactivity theme emerged on 185 occasions through codes: *interactivity*, *speech and talking*, *commanding the robot*, *fun*, *noises* and *interactivity lacking*, strongly suggesting that during live, unprompted interactions, older people demonstrated preference for interactive devices over non-interactive alternatives. The results also indicated eye contact, obeying commands and speech could be improvements on currently available devices.

Interactivity elicited positive comments from participants such as "*fascinating*," (OP15) and provided a sense of achievement when a device appeared responsive; "*I got the*



1  
2  
3 *cat to roll over!*" (OP16). Participants demonstrated most enjoyment when robots  
4 appeared reactive to the individual themselves, rather than producing random  
5 movements or sounds; *"fun isn't it!"* (OP6). In contrast, non-interactive devices  
6 provoked negative responses. The Perfect Petzzz dog was described as *"a bit of a*  
7 *disappointment,"* (OP6) as the dog *"doesn't do much"* (OP16) which may become  
8 *"boring"* (OP12) as *"you can't do more than pat its head"* (OP17). Perhaps surprisingly,  
9 participants also underappreciated the interactivity of Paro. The Joy for All animals  
10 were seen as highly interactive, despite more limited technological features, while  
11 Paro was described as *"on strike"* (OP7) because participants felt it *"just moves its*  
12 *head"* (OP3, OP1). Participants interacting with Paro sometimes displayed slight envy  
13 towards peers interacting with the Joy for All animals, *"you've done more with that cat*  
14 *than I got to do"* (OP11).

15  
16  
17  
18  
19  
20  
21  
22  
23  
24  
25  
26  
27  
28  
29  
30  
31  
32  
33 Despite enjoying interactivity of available robots, older people also expressed a  
34 desire for command response from robots during free interactions. The commands  
35 each animal received varied. Those directed at the Joy for All dog were based on  
36 expectations of live dogs, with participants requesting *"high five"* (OP3-4), *"give paw"*  
37 (OP3, OP5, OP8, OP10, OP15, OP17) or *"lie down"* (OP5), on 11 occasions. The  
38 Joy for All cat received similar requests including *"can you wag your tail?"* (OP3,  
39 OP1, OP8). Miro mainly received directional commands, *"turn around!"* (OP5-6,  
40 OP10-11, OP13, OP15, OP17-18) *"stop, turn, turn left, turn left"* (OP13) and Pleo  
41 received requests to play and eat; *"open wide, open wide, open up, that's it!"* (OP13).  
42 Participants also repeatedly asked robots to *"look at me"* (OP5, OP7, OP16, OP15)  
43 suggesting facial tracking and eye contact could be a future interactivity  
44 improvement: Paro and the Joy for All animals received praise as *"special"* for  
45  
46  
47  
48  
49  
50  
51  
52  
53  
54  
55  
56  
57  
58  
59  
60

1  
2  
3 *“looking right at”* the participant (OP2, OP4, OP13, OP17). Most frustration was  
4  
5 noted commanding the non-interactive Perfect Petzzz dog, with 15 participants  
6  
7 requesting or commanding the dog to *“wake up”* (OP1-6, OP9-13, OP16-18) or  
8  
9 *“open your eyes”* (OP5-6, OP8-9, OP12, OP16). Participants reported limited appeal  
10  
11 in an animal without responses, suggesting the non-interactive dog appeared *“dead”*  
12  
13  
14  
15 (OP17).

16  
17  
18  
19 Participants also demonstrated desire for robot speech, comparing devices to the  
20  
21 resident budgie, and asking *“talk to me good boy”* (OP7) because it would *“be better*  
22  
23 *than talking to myself”* (OP7). Another participant commented *“it’s the company [sic] I*  
24  
25 *talk to the furniture! [sic] if you live alone you often don’t hear voices”* (OP13), and *“I*  
26  
27 *like to talk to things [sic] I think I just like to hear a voice”* (OP14). Another spoke to  
28  
29 Pleo, saying *“I wish you could talk, yes I wish you could talk”* (OP16). Similarly, on 11  
30  
31 occasions, participants confused Miro’s electronic noises (not recognisable as specific  
32  
33 animal vocalisations) with language, repeating, *“what are you saying?”* (OP5) *“you’re*  
34  
35 *trying to talk aren’t you?”* (OP17) and *“I don’t know if it’s actual words or not”* (OP14).  
36  
37  
38  
39 Upon understanding Miro’s noises were not *“actual words”* one participant described  
40  
41 the robot as *“a dead loss”* (OP17).  
42  
43  
44  
45  
46

47  
48  
49 Nonetheless, participants still initiated conversation with non-speaking animals; *“what*  
50  
51 *can we call you? We can call you Dino. It’s not very original [sic], Dino, do you want to*  
52  
53 *play again or eat?”* (OP6). This sometimes resulted in disappointment when devices  
54  
55 failed to respond verbally, *“you won’t be much use to me if you don’t talk to me”* (OP9),  
56  
57 *“he doesn’t talk back though,” “can it hear? It’s got no ears!” “If he can’t hear, he can’t*  
58  
59 *talk to me”* (OP16).  
60

## Familiarity

This theme represents participants' desire for companion robots to be realistic and familiar in form, and emerged from codes; *realistic animal, familiarity, comparison to real animals, reminiscence, life-simulation, and toys*. Evidence arose on 71 occasions.

Participants commented on preferring cats or dogs, as what they had *"always had"* (OP13, OP17) and were *"used to"* (OP8). The realistic, familiar options available also elicited comparisons to real animals, on 25 occasions with the Perfect Petzzz dog, and Joy for All cat and dog. Participants compared devices to previous pets, *"this one's like Harry"* (OP5) or discussed benefits of robot alternatives as being *"far easier"* (OP3) because *"you don't have to take it out [sic] and clean up after it"* (OP8) and *"it won't malt"* (OP4). Familiar animals also prompted reminiscence on 12 occasions, probably due to greater relatability, such as *"I had [sic] Yorkshire terrier, tiny terrier, used to get lagged in the mud"* (OP8). Only one occasion was negative: one participant had experienced *"a dead cat in the water off the pier when I was about 9"* (OP5).

In contrast, unfamiliar forms were perceived by older people as *"a toy"* (OP1) and more infantilising. During interactions with Miro and Pleo, one participant discussed preference for *"something, that to me, looks like something we've had, like dogs and cats and things, we've had dogs and cats you see"* (OP10). Participants showed clear preference for familiar forms, and realistic design, over unfamiliar when both were available; *"that is realistic [dog], we're not very likely to come into contact with*

1  
2  
3 *one of them [seal]" (OP5)*. Participants suggested seals were incongruent with their  
4 context, believing seals belong *"on the ice floats" (OP4)* or *"eaten with pepper sauce"*  
5 *(OP4)*. The familiar animals were most often the devices praised for looking  
6 *"realistic" (OP3)*, or behaving in a way that appeared *"very real" (OP5)*.  
7  
8  
9

10  
11  
12  
13  
14 Additionally, the breathing feature of the Perfect Petzzz dog was well received; *"it's*  
15 *fascinating to watch him breathing" (OP15)*. It appears any feature increasing the  
16 'realness' of a companion was beneficial. Participants reported life-simulation  
17 features such as the breathing made the robots look *"living" (OP17)*. This feature  
18 was commented on 13 times, and often a source of conversation between  
19 participants.  
20  
21  
22  
23  
24  
25  
26  
27  
28  
29

### 30 31 **Shell design**

32  
33 This theme arose on 89 occasions through codes; *realistic animal, physical features,*  
34 *shell-type, favouritism, preference, texture and likeability*. The evidence strongly  
35 suggested older people preferred soft, furry companion robots, but also favoured big  
36 eyes. Participants did prefer features making animals appear more realistic, as  
37 discussed above.  
38  
39  
40  
41  
42  
43  
44  
45  
46

47 Paro's eyes were specifically commented on positively by six older people. The *"big*  
48 *eyes" (OP1, OP4)* were described as *"cute" (OP2)* and appeared to draw participants  
49 towards the seal; *"ohhh look at your eyes!" (OP11)*. Participants also particularly  
50 appreciated Paro's prominent eyelashes; *"ladies will wish they had lashes like him!"*  
51 *(OP6)*. Other large eyes also received praise, including Furby's animated eyes that  
52 were particularly *"captivating" (OP16)*.  
53  
54  
55  
56  
57  
58  
59  
60

1  
2  
3  
4  
5  
6 Older people praised animals with fur for cuddliness and suggested, in response to  
7 non-furry options, that they “*want something [sic] you could smooth and it feels like*  
8 *an animal, you know, like that [Joy for All] cats got fur*” (OP10). On 11 occasions  
9  
10 participants responded negatively to plastic shells of Pleo and Miro, as they did not  
11  
12  
13  
14 “*feel quite as friendly*” (OP11). In contrast, Paro’s fur was described as “*lovely*” (OP8)  
15  
16 and “*soft*” (OP11). While participants appeared to acknowledge Paro possessed  
17  
18 softer fur than alternative furry animals, the Joy for All cat fur was praised for being  
19  
20 less pristine. Participants suggested the cat “*looks a bit bedraggled*” (OP7) which  
21  
22 resulted in time spent brushing and grooming. One participant suggested the fur  
23  
24 looked “*so real*” (OP1) suggesting the longer, shaggier coat felt more congruent with  
25  
26  
27  
28  
29  
30  
31  
32  
33  
34  
35  
36  
37  
38  
39  
40  
41  
42  
43  
44  
45  
46  
47  
48  
49  
50  
51  
52  
53  
54  
55  
56  
57  
58  
59  
60  
cat expectations.

### Ownership

35 This theme arose on 30 occasions, through codes; *naming, ownership, and*  
36  
37  
38  
39  
40  
41  
42  
43  
44  
45  
46  
47  
48  
49  
50  
51  
52  
53  
54  
55  
56  
57  
58  
59  
60  
*personalisation* and represents older people demonstrating some attachment  
towards robots during free interactions.

44 Naming was thought to relate to ownership, as naming a live animal occurs with  
45  
46  
47  
48  
49  
50  
51  
52  
53  
54  
55  
56  
57  
58  
59  
60  
possession, and signifies a developing relationship (38). Older people sometimes  
used names of previous pets, such as “*Milo*” (OP1) because “*they’ve got a cat called*  
*Milo*” (OP3). Other participants chose generic names, such as “*Fido*” (OP11) or  
“*Tigger*” (OP4) while some got creative with names like “*Shandy*” (OP7) because the  
dog “*is a mixture*” (OP7). Once older people had allocated a name, it endured

1  
2  
3 throughout their interaction, “*are you wagging your tail for me Shandy?*” (OP7).  
4

5 Naming occurred mostly with the Joy for All cat and dog.  
6  
7  
8  
9

10 Further evidence for ownership came from a code of the same name. Ten older  
11 people commented on acquiring a robot during free interactions, such as “*do you*  
12 *know, I’d love this [cat], I’d love this in my apartment*” (OP2). Another suggested “*the*  
13 *service should have one [Joy for All dog]*” (OP6) with peers commenting in  
14 agreement; “*we’ll all go out and buy one now!*” (OP17). Of all occurrences,  
15 ownership was only shown towards the Joy for All cat and dog, suggesting good  
16 acceptability of these two devices.  
17  
18  
19  
20  
21  
22  
23  
24  
25  
26  
27

28 We felt personalisation related to ownership, as wanting to adapt a robot for personal  
29 use implies a desire to keep it. Evidence for personalisation was not prolific during  
30 free interactions, with hints of personalisation being desired occurring only twice.  
31 One participant enjoyed the Joy for All dog, but requested a larger size as “*I don’t do*  
32 *little doggies*” (OP16). The participant requested it “*look like a golden retriever*”  
33 because “*it’s the only dog we’ve ever known*” (OP16). It is possible evidence was  
34 limited during free interactions as participants were unaware of the possibility.  
35  
36  
37  
38  
39  
40  
41  
42  
43  
44  
45  
46

## 47 **Section 2: Focus Group Results**

48  
49 This section presents the focus groups results as a numerical comparison between  
50 end-users and developers, to provide a clear understanding of any differences  
51 between the two groups. The features presented represent the most prevalent themes  
52 during content analysis of responses to Key Questions (Table 1). For both groups, an  
53 overall score was calculated for each feature (n participants responding positively  
54  
55  
56  
57  
58  
59  
60

minus n participants responding negatively). The difference between roboticists and older people's opinions for each feature was then calculated. Examples of focus group responses for comparison are also provided, for greater depth of understanding.

**Table 2: The number of older people and roboticists providing positive, negative or non-responses for each feature and the resultant level of difference or agreement**

|                                 |              | Soft          |           |            |              |           |           |           | Life-<br>simulation |
|---------------------------------|--------------|---------------|-----------|------------|--------------|-----------|-----------|-----------|---------------------|
|                                 |              | Interactivity | Fur       | Talking    | Personalised | Realistic | Familiar  | Mythical  |                     |
| <b>Older<br/>People</b><br>n=17 | Positive     | 15            | 12        | 12         | 15           | 12        | 4         | 1         | 5                   |
|                                 | Negative     | 0             | 1         | 5          | 1            | 1         | 0         | 5         | 0                   |
|                                 | None         | 2             | 4         | 0          | 1            | 4         | 13        | 11        | 12                  |
|                                 | <b>Score</b> | <b>15</b>     | <b>11</b> | <b>7</b>   | <b>14</b>    | <b>11</b> | <b>4</b>  | <b>-4</b> | <b>5</b>            |
| <b>Roboticists</b><br>n=18      | Positive     | 14            | 8         | 2          | 7            | 2         | 1         | 1         | 3                   |
|                                 | Negative     | 2             | 1         | 13         | 8            | 11        | 10        | 1         | 2                   |
|                                 | None         | 2             | 9         | 3          | 3            | 5         | 7         | 16        | 13                  |
|                                 | <b>Score</b> | <b>12</b>     | <b>7</b>  | <b>-11</b> | <b>-1</b>    | <b>-9</b> | <b>-9</b> | <b>0</b>  | <b>1</b>            |
| <b>Score difference</b>         |              | <b>3</b>      | <b>4</b>  | <b>18</b>  | <b>15</b>    | <b>20</b> | <b>13</b> | <b>4</b>  | <b>4</b>            |

Key: green = difference  $\leq$  4, orange = difference  $\geq$  13

Table 2 compares opinions of older people and roboticists towards design of companion robots specifically for older people. The largest divergences in opinions were noted for scores for realistic aesthetic, robots talking human language, personalisation of robots and familiar form. Older people and roboticists seem to agree

1  
2  
3 on the need for interactivity and soft-fur in response to Key Questions 1 and 2 (Table  
4  
5 1). There also appears to be some agreement between the two groups on inclusion of  
6  
7 life-simulation features and mythical design, although older people were generally  
8  
9 more positive towards life-simulation and more negative towards mythical design.  
10  
11 Some participants did not respond to every feature, resulting in lower numbers of  
12  
13 responses for some features. Familiarity, life-simulation and mythical design received  
14  
15 lower responses, possibly suggesting these features were less important, and thus  
16  
17 participants felt less inclined to comment. However, this could also derive from the  
18  
19 semi-structured nature of the focus groups, where realistic, familiar or mythical design  
20  
21 were all discussed in relation to Key Question 10.  
22  
23  
24  
25  
26  
27  
28  
29  
30  
31  
32  
33  
34  
35  
36  
37

38 The preferred animal among older people in response to Key Question 8 was the  
39  
40 Joy for All cat, with 9/17 (53%) participants selecting this animal (Figure 3), followed  
41  
42 by the Joy for All dog. Paro, Miro and the homemade hedgehog were not selected by  
43  
44 any older person. The preferred animal among roboticists was Paro (11/18), followed  
45  
46 by Pleo the dinosaur, then the homemade hedgehog. The Joy for All dog and cat,  
47  
48 Miro, the Perfect Petzzz dog and Furby were not selected by any roboticists, and some  
49  
50 roboticists did not select any of the available animals.  
51  
52  
53  
54  
55  
56  
57

58 **Table 3: Examples of evidence from each group during focus group discussions**  
59  
60



| Theme           | Older People                                                                                                                                                                                                                                                                                                                     | Example Evidence                                                                                                                                                                                                                                                                                                                                                                                                                                                                        | Robotocists |
|-----------------|----------------------------------------------------------------------------------------------------------------------------------------------------------------------------------------------------------------------------------------------------------------------------------------------------------------------------------|-----------------------------------------------------------------------------------------------------------------------------------------------------------------------------------------------------------------------------------------------------------------------------------------------------------------------------------------------------------------------------------------------------------------------------------------------------------------------------------------|-------------|
| Interactivity   | <p data-bbox="424 309 938 376">“If you’re sat there on your own, you want some reaction” (OP6)</p> <p data-bbox="400 421 938 600">“That one [Joy for All cat] is almost perfect, but perhaps if you could say, do you want to play, and then it could then do something, a little bit more interactive” (OP13)</p>               | <p data-bbox="975 309 1506 488">“I think something passive, that doesn’t make a lot of sounds, it could be stressful, too much [sic] You could have a sack that’s warm and purrs” (R3)</p> <p data-bbox="975 533 1506 743">“I think it should have high level interaction, because it would keep the interaction longer as well, if you just have a pet like this with one or two features, it’s done, it’s limited” (R9)</p>                                                           |             |
| Soft fur        | <p data-bbox="400 788 938 900">“Day to day cleaning, you could wipe over it [Pleo], furry thing would be harder” (OP5)</p> <p data-bbox="400 945 938 1048">“Fur I think so. The plastic I found very cold, not something you would, sorta, cuddle” (OP13)</p>                                                                    | <p data-bbox="975 788 1506 936">“I don’t think so, because it isn’t cleanable, if you wanted something to cuddle you could just buy a stuffed toy” (R14)</p> <p data-bbox="1027 981 1506 1048">“Nice and furry, you could kinda cuddle it” (R18)</p>                                                                                                                                                                                                                                    |             |
| Talking         | <p data-bbox="400 1160 938 1227">“[animals] don’t talk, there are sounds that creatures make” (OP6)</p> <p data-bbox="400 1272 938 1451">“For older people living on their own in particular, we all talk to ourselves anyway, you don’t feel so stupid if you talk to something that responds to you” (OP13)</p>                | <p data-bbox="975 1160 1506 1451">“from a technological point of view, speech should be left out of the equation, especially with elderly people, and people with dementia, they wouldn’t have expressions or fully structured sentences which would get frustrating if the robot didn’t understand” (R1)</p> <p data-bbox="975 1496 1506 1639">“I can see the appeal, [sic] a rudimentary conversation might be quite nice, as long as you didn’t feel like a twit doing it” (R11)</p> |             |
| Personalisation | <p data-bbox="400 1706 938 1774">“If it was knitted, it wouldn’t be able to move its eyes and mouth” (OP5)</p> <p data-bbox="400 1818 938 1998">“It’s quite a good idea, yeah I do, someone who’s got a particular animal” “We were talking about colours, I like that one, she’s always had black cats, It would be nice to</p> | <p data-bbox="975 1706 1506 1966">“That might ruin the illusion I’d say” “if you’ve eaten like a chicken, if you’ve seen the actual process, you would not feel so good about it [sic], when you see the finished product without knowing how, it’s sometimes better” (R2)</p>                                                                                                                                                                                                          |             |

1  
2  
3  
4  
5  
6  
7  
8  
9  
10  
11  
12  
13  
14  
15  
16  
17  
18  
19  
20  
21  
22  
23  
24  
25  
26  
27  
28  
29  
30  
31  
32  
33  
34  
35  
36  
37  
38  
39  
40  
41  
42  
43  
44  
45  
46  
47  
48  
49  
50  
51  
52  
53  
54  
55  
56  
57  
58  
59  
60

|                 |                                                                                                                                                                                                                                      |                                                                                                                                                                                                                                                                                                                                                                                        |
|-----------------|--------------------------------------------------------------------------------------------------------------------------------------------------------------------------------------------------------------------------------------|----------------------------------------------------------------------------------------------------------------------------------------------------------------------------------------------------------------------------------------------------------------------------------------------------------------------------------------------------------------------------------------|
|                 | have a choice of different colours”<br>(OP13)                                                                                                                                                                                        | “It would be amazing, it would give it a personal touch, it’s like having a new [smartphone] and getting a new cover, people love that” (R10)                                                                                                                                                                                                                                          |
| Realistic       | “For someone who’s always had animals, they feel that loss, so for them, something realistic that they could interact with” (OP1)<br><br>“as long as it’s got big eyes and attractive I don’t mind” (OP17)                           | “It would make more sense” (R1)<br><br>“No [sic] if it’s not realistic, you wouldn’t be hoping it would be a real dog so” (R16)                                                                                                                                                                                                                                                        |
| Familiarity     | “because they [cat and dog] are more domesticated animals, whereas a seal you wouldn’t have a seal in your home” (OP1)<br><br>“I think if you’d had a cat or a dog, it would be better to have something you could relate to” (OP12) | “for the elderly it should be something familiar” (R2)<br><br>“I think because of uncanny valley it doesn’t have to be something that we are used too” (R7)                                                                                                                                                                                                                            |
| Mythical        | “That’s a generation thing, kids would love it but not here” (OP1)<br><br>“Maybe in five years time..” (OP16)                                                                                                                        | “I also think something super unrealistic like the Furby would be creepy as well, it’s so bizarre you could be turned off by it, it’s weird, a baby seal, you’re not accustomed to the animal so whatever it does is just cute” (R8)<br><br>“The mythical Furby looks right because you’ve got no expectations, so you cannot do it wrong, you cannot break expectations” (R13)        |
| Life-simulation | “Warmth under belly to keep your knees warm!”<br>(OP1)<br><br>“If it was breathing, it would be almost a real cat, and again, it’s a soothing thing” (OP14)                                                                          | “I can feel on the dinosaur, coming from an engineering point of view, with all that inside and trouble circulating the air, you can feel it gets warm, but I think that’s actually a good thing, that you can feel, it’s even more, like lizard like, even more appearing like something” (R6)<br><br>“The problem is I think it has to be done well, and it’s really difficult to do |

---

well, it could end up creepy and weird” (R14)

---

Table 3 provides examples of the different views of older adults and roboticists during focus group discussions, further examples can be found in Supplementary File 1.

### Section 3 – Relationship between Free Interaction and Focus Group Data

This section explores how the themes arising during unprompted, free interaction support the validity of the prompted focus group results (Figure 4): all older people who discussed interactivity (15/17, 88.24%) desired this feature for a robot pet. As seen in Section 1, this feature was highly valued by older people during free interactions, with many participants desiring additional interaction, such as obeying commands and talking. In the the focus group theme of talking 12/17 (71%) older people felt positively towards robot speech.

The free interaction theme *familiarity* supports the focus group results where all older people who commented (4/17, 24%) preferred familiar forms, and 12/17 (71%) preferred realistic or life-like appearance, with only 1/17 (6%) older people responding negatively to life-like appearance (thus 92.31% of responses were positive). The higher percentage of non-responses to familiarity could suggest participants felt less strongly about this feature, and thus less inclined to comment. However, the qualitative results from free interactions would dispute this, with very strong support arising in favour of a familiar animal. Therefore, it may instead be possible that participants did not necessarily distinguish between realistic and familiar (as realistic, unrealistic and mythical were the words used within the Key Questions).

1  
2  
3 The free interaction theme on shell-type and clear preference for soft fur are  
4 congruent with focus group results where 12/17 (71%) older people preferred soft fur,  
5 while only 1/17 (6%) disagreed (92% of responses positive). Life-simulation was not  
6 discussed at length during free interactions, although the Perfect Petzzz breathing  
7 feature was well received. This feature also had lower response rates during focus  
8 groups. The lower response rate for this feature could again suggest that, while life-  
9 simulation may be desirable, supported through decisive responses (100% of  
10 responses were positive), it may be less of a priority, with 12/17 (71%) older people  
11 not providing opinions. Despite limited direct discussion during free interactions, the  
12 potential inclusion of this feature is supported by the familiarity theme, whereby any  
13 aesthetic or technological features increasing the 'realness' of a pet appeared well  
14 received during unprompted free interaction.

15  
16  
17  
18  
19  
20  
21  
22  
23  
24  
25  
26  
27  
28  
29  
30  
31  
32  
33 While personalisation was not highly prevalent during free interaction, some  
34 evidence was seen within the ownership theme, with a participant requesting a golden-  
35 retriever design. Within focus groups, 15/17 (88%) older people felt positively towards  
36 personalisation, and only 1/17 (6%) provided opposition (94% of responses were  
37 positive). It is possible personalisation garnered limited discussion during free  
38 interactions as participants were unaware it was possible. The range of suggestions  
39 of preferred animals upon proposal of personalisation however would certainly  
40 suggest some benefit to this approach.

## 41 42 43 44 45 46 47 48 49 50 51 52 53 **DISCUSSION**

54 User-centred design is often cited as beneficial (4, 26) but rarely used in companion  
55 robot development. The differing preferences of end-users and potential developers  
56  
57  
58  
59  
60

1  
2  
3 in our direct comparison demonstrated the importance of user-centred design when  
4 developing companion robots for older people. Our results justify additional effort for  
5 the reportedly difficult process of integrating user requirements into design (29), and  
6 may aid acceptability of user-centred design in practice (26). Some of our roboticists  
7 felt user involvement in development could damage illusions of the robot, perhaps  
8 helping explain the minimal use of this process. However, rather than damaging  
9 illusions, adopting user-centred design may actually ensure devices receive adequate  
10 acceptability to promote use (25). Future development of robots using user-centred  
11 approaches may result in more consistent positive outcomes than those previously  
12 reported for Paro (17, 18, 20, 21). Implications of improved design, acceptability and  
13 use would be significant given the potential benefits of companion robots for older  
14 people, those with dementia, and their family and care team (11-16). Our results  
15 suggest strong acceptability and preference of the Joy for All cat and dog, and limited  
16 acceptability of Paro when these more familiar/realistic comparisons are available.  
17 This result is important given a lack of comparison studies of companion robots (39)  
18 and apparent selection bias towards Paro in research (10).

19  
20  
21  
22  
23  
24  
25  
26  
27  
28  
29  
30  
31  
32  
33  
34  
35  
36  
37  
38  
39  
40  
41  
42 Further to highlighting the value of user-centred design, this study provided initial  
43 insights on end-user design requirements. Older people and roboticists both saw  
44 interactivity as important. Older people wanted interactivity for companionship, fun,  
45 and reduced loneliness through responsiveness. Some roboticists on the other hand  
46 raised concerns on over-stimulating older people. Our older adults displayed little  
47 interest towards non-interactive animals, whose lack of responsiveness appeared  
48 frustrating. This disinterest in unresponsive/inactive companions is congruent with the  
49 finding that an 'active' Paro was more engaging than an 'inactive' Paro (18). While  
50  
51  
52  
53  
54  
55  
56  
57  
58  
59  
60

1  
2  
3 interactivity appears essential, our results demonstrated the advanced responsivity of  
4  
5 Paro may be unnecessary. Despite having fewer technological abilities, the Joy for All  
6  
7 cat was perceived as most interactive, most likely because of its greater range of  
8  
9 movements available, including animated head and legs, rolling-over, blinking and  
10  
11 cleaning movements. Therefore, the range and variety of responses may be more  
12  
13 important than the sophistication of sensors a robot possesses.  
14  
15  
16  
17  
18

19 Our older people were interested in companion robots understanding and responding  
20  
21 to simple commands. Use of commands is only briefly mentioned in previous literature  
22  
23 (32), and our findings appear contrary to a study (40) that found no evidence for the  
24  
25 importance of enjoyment or playfulness factors among community dwelling older  
26  
27 adults. Our group actively sought playfulness from robots, believing this would sustain  
28  
29 enjoyment for longer. Responsiveness to simple commands such as “paw” could be a  
30  
31 consideration for future robot design. Interestingly, there were fewer command  
32  
33 expectations for the Joy for All cat than other robots, perhaps due to a reduced  
34  
35 association between live cats and training versus live dogs. These expectations could  
36  
37 be used to support use of an unfamiliar form such as Paro, whose design was aimed  
38  
39 at reducing expectations (41). However, older people still displayed command  
40  
41 expectations for Pleo, Miro and Paro, (unfamiliar forms), disputing this theory. One  
42  
43 could speculate that the cat’s larger quantity of movements results in a reduced need  
44  
45 to command actions.  
46  
47  
48  
49  
50  
51  
52  
53

54 Older people also positively evaluated the potential for human speech from a  
55  
56 companion robot. These results contradict the suggestion that, congruent with the  
57  
58 uncanny valley theory, human acceptability of sounds depends on the realism of the  
59  
60

1  
2  
3 context (42). In one study (43) participants related less to an AIBO dog beeping than  
4  
5 a computer emitting an identical sound, perhaps due to contradiction in context  
6  
7 between a dog and a beeping noise, thus suggesting that animal sounds would be  
8  
9 most acceptable for animal robots. Our results, however, indicated positive attitudes  
10  
11 towards speech capabilities for provision of company. Frennert and Ostlund(33)  
12  
13 reported that developers were influenced by stereotypical perceptions of older people  
14  
15 as lonely and fragile, but failed to incorporate requirements of participating older  
16  
17 people into design. Our group of older people thought loneliness could be eased  
18  
19 through devices capable of simple conversation. This could be a user-driven  
20  
21 improvement to currently available companion animals if our results are replicated in  
22  
23 wider samples. It is possible, however, that this feature will be evaluated differently in  
24  
25 possible future research with a sample of cognitively impaired older people. Our  
26  
27 participants were cognitively intact and therefore aware of the artificial nature of the  
28  
29 robots or toys; older people with dementia may find the incongruence of human  
30  
31 speech from an animal less acceptable.  
32  
33  
34  
35  
36  
37  
38  
39

40 Eye contact was a further improvement desired by older people, some of whom were  
41  
42 disappointed when robots failed to look towards them. Gaze following may increase  
43  
44 social relevance of the robot. This may be particularly true when eye movement is  
45  
46 intentional rather than random (44). While the pre-programmed movements of the Joy  
47  
48 for All cat were positively evaluated, intentional gaze following may be an improvement  
49  
50 for optimal social companionship. The importance of improving sociability for robot  
51  
52 acceptance was noted before (45), and this addition of apparent social behaviour  
53  
54 could improve acceptability.  
55  
56  
57  
58  
59  
60

1  
2  
3 Most older people preferred soft, cuddly fur for the outer shell. Our group of roboticists  
4 generally agreed, although both groups raised concerns regarding hygiene in  
5 comparison to a hard shell. This corroborates previous findings on care providers'  
6 preferences for robots aimed at their older service users (34, 46), although others have  
7 reported older people's preference for mechanical design on robots (28). These results  
8 may reflect the broader range of socially assistive robots used (machine-like,  
9 mechanical, human-like and animal-like robots); however, results generally imply a  
10 robot should indeed be recognisable as robotic (28). One study (21) also reported a  
11 family member demonstrating stigma towards his father interacting with soft-toys,  
12 suggested potential gender barriers with soft, cuddly robots. Our study found no  
13 notable difference between males and females, and suggests that companion robots  
14 for this market should use soft fur in the design. Providing the optimum tactile  
15 characteristics are particularly important considering evidence suggests touch is one  
16 of the most important modalities of interaction for dementia patients, creating a natural  
17 method to engage with animaloid robots (47).  
18  
19  
20  
21  
22  
23  
24  
25  
26  
27  
28  
29  
30  
31  
32  
33  
34  
35  
36  
37  
38  
39

40 Considering the importance of tactile characteristics (46), a further feature for  
41 consideration in future development is life-simulation, another capability positively  
42 evaluated by older people, but lacking from current examples including Paro. Our  
43 research supports the previously reported (46) assumption of care-providers that a  
44 simulated heartbeat would be a valuable addition to Paro, but additionally  
45 demonstrates that older people themselves also valued life-simulation features,  
46 including simulated heartbeat, simulated breathing and the feeling of purring. Older  
47 people even suggested warmth as an additional feature. This result appears congruent  
48 with older adults' desire for a realistic, life-like companion.  
49  
50  
51  
52  
53  
54  
55  
56  
57  
58  
59  
60



1  
2  
3  
4  
5 A realistic, familiar animal form was a definite aesthetic requirement for our group of  
6 older people. This was also reflected in their choice of Joy for All cat as their preferred  
7 device, as a familiar, realistic option, with Paro not selected by any older adult.  
8  
9 Previous research focusing on opinions of care providers revealed criticism of Pleo for  
10 lack of familiarity (34), while the intentionally unfamiliar Paro (41) is the most often  
11 utilised companion robot in research (10). The end-users in our research thought that  
12 Paro, like Pleo, was too unfamiliar. The most familiar animals, the Joy for All cat and  
13 dog, were preferred for being more relatable and congruent with the contexts in which  
14 older people lived. The unfamiliar forms appeared incongruent and infantilising,  
15 perhaps explaining the tension Lazar et al. (32) found towards their selection of  
16 unfamiliar animals.  
17  
18  
19  
20  
21  
22  
23  
24  
25  
26  
27  
28  
29  
30  
31  
32

33 This is relevant insofar as some companion robots, such as Paro, are intentionally  
34 designed using unfamiliar forms to avoid the robots failing to meet expectations (41).  
35 Most of our roboticists followed this line of thinking and responded negatively to  
36 familiar animals, unsurprisingly selecting Paro as their preferred companion robot. It  
37 is further likely the roboticists appreciated the advanced technical capabilities of Paro,  
38 but our study suggests such sophistication may be unnecessary for older people.  
39 Research conducted 19 years ago also suggested older people disliked the feel and  
40 behavior of a robot cat compared to real cats (47); however, currently available robotic  
41 cats are likely more realistic than the Tama OMRON Corp cat used in that study.  
42  
43  
44  
45  
46  
47  
48  
49  
50  
51  
52  
53  
54  
55

56 The preference for realistic and familiar robots may result from relatability, with older  
57 people perhaps having personal experience of cats and dogs given the prevalence of  
58  
59  
60

1  
2  
3 ownership of these species (48). Familiar animals may provide recognisable potential  
4 for a loving relationship. Even individuals without personal pet ownership experience  
5 will have likely witnessed others with pets, and therefore the familiar form of a dog or  
6 cat is symbolic of that potential bond and relationship. The tendency for our group of  
7 older people to name the Joy for All cat and dog more often than alternatives suggests  
8 familiarity may additionally help facilitate a sense of ownership. Thus, our results imply  
9 that, rather than being problematic (41), memories and schemas of familiar animals  
10 may actually be beneficial. A further implication of familiar companion robots relates  
11 to reminiscence theory, which suggests benefits of reminiscence for older people  
12 including decreased depression (49). Reminiscence therapy uses memories, feelings  
13 and thoughts from the past to facilitate pleasure (50). Evidence of reminiscence was  
14 found in our study, and seems congruent with this theory, as memories of past pets  
15 and animals were shared with positive affect. It is therefore possible familiar  
16 companion robots would have additional wellbeing benefits, particularly for individuals  
17 with dementia.  
18  
19  
20  
21  
22  
23  
24  
25  
26  
27  
28  
29  
30  
31  
32  
33  
34  
35  
36  
37  
38  
39

40 The possibility of personalisation was also positively perceived by older people and  
41 thus could be a consideration for future robot design. Personalisation has been  
42 mentioned in previous research (28, 34), but has not been explored directly with end-  
43 users. Our older people positively evaluated a more person-centred approach to robot  
44 aesthetics, praising the potential to interchange robot 'skins' to match personal  
45 preference. It is possible personalised robots would be more acceptable than a single  
46 design for all users. This could alleviate some disparity in response to Paro, as seen  
47 in previous RCT research (22).  
48  
49  
50  
51  
52  
53  
54  
55  
56  
57  
58  
59  
60

1  
2  
3 In contrast, our roboticists underestimated the value of personalisable aesthetics, and  
4 failed to predict older people's desire for human speech and life-simulation features.  
5  
6 The transcript evidence suggests roboticists had an awareness of Mori's uncanny  
7 valley hypothesis (51). This is not surprising given their field of interest, and it is  
8 possible this, and related literature, had influenced roboticists' views on robot design  
9 to favour unrealistic and unfamiliar forms, and to undervalue life-simulation features  
10 that would undoubtedly increase the realistic impression of a robot.  
11  
12  
13  
14  
15  
16  
17  
18  
19  
20

21 Although our study was limited by recruiting older people from just one setting and  
22 roboticists from one University (although from varied educational and occupational  
23 backgrounds) we found marked differences in their views that need to be accounted  
24 for in the development of companion robots. If creative methods of coproduction are  
25 used (52), both groups would need to think more about why they liked certain features  
26 and it is likely they would develop a new product that would be owned by this co-design  
27 group. Although there are no guarantees, a product so designed might have a higher  
28 chance of being liked by the wider population of older people.  
29  
30  
31  
32  
33  
34  
35  
36  
37  
38  
39  
40  
41

42 Our study recruited older people from a retirement complex and the generalisability of  
43 their views to care home residents is limited. Our finding of the acceptability of such  
44 devices among a more independent sample is in contrast to previous research which  
45 implied more independent older people felt 'too able' to use robots (28). Thus, there  
46 may be a market among this more independent sample that has previously been  
47 underestimated.  
48  
49  
50  
51  
52  
53  
54

55  
56  
57  
58 Another limitation of our study was the short interaction time of ten minutes at each  
59  
60

1  
2  
3 station, providing initial preferences. Research has suggested acceptance should be  
4 measured over longer periods of use, allowing for familiarisation and more informed  
5 attitudes towards the device, which may be more predictive of actual use (53). Future  
6 longitudinal research is therefore required exploring how these initial preferences  
7 develop over time, to assess any differences in loss of engagement, or wellbeing  
8 outcomes. Our interaction period was however longer than previous research where  
9 participants only interacted with each robot for one minute (34).

10  
11  
12  
13  
14  
15  
16  
17  
18  
19  
20  
21 Our study's smaller group sizes compared to previous research (34) may have limited  
22 influence of social desirability bias or group dynamics. The small sample size, and  
23 small numbers of responses to some features during focus groups, is a further  
24 limitation. On the other hand, use of qualitative, free interaction transcriptions  
25 increases confidence in our focus group results, even where response numbers were  
26 low, as preferences were often evident through unprompted interaction.

27  
28  
29  
30  
31  
32  
33  
34  
35  
36  
37 An important strength of the current study is the active participation of older people  
38 themselves. Some previous research exploring design features of companion robots  
39 for older people focused mainly on care provider opinions (28, 46). Our research has  
40 provided support for some previously identified features, but furthered this evidence  
41 base through identification of design features previously unthought-of by care  
42 providers. A further strength includes the use of a range of robots and toys, some  
43 specifically designed for older people, unlike previous related literature (32), providing  
44 a varied array of features of interest and allowing older people to provide truly informed  
45 opinions.

## Conclusion

We have provided empirical support for the necessity and value of incorporating user-centred design in the development of companion robots targeted at older people. While user-centred design has been recommended previously, there has been little direct evidence to support this requirement. Our results demonstrate stark differences in preferences and requirement between older people and roboticists, suggesting engaging the end-user in the design and development of companion robots is essential. This study also began the process of researching companion robot design with end-users themselves. The older people in our sample have suggested soft fur, interactivity and big 'cute' eyes, as being priority features on a robot. Older people also strongly suggested the robot should take the form of a realistic, familiar animal, raising questions surrounding the design of the most well researched companion robot, Paro. Further desirable functions were also identified that are not currently included as standard on companion robots, such as eye-contact, life-simulation features, personalisation, obeying commands and the potential for interactive language.

**Funding Statement** H. Bradwell's PhD was funded by a PhD studentship from the School of Nursing and Midwifery at the University of Plymouth. The robots used in this study were loaned from the School of Nursing and Midwifery and the Ehealth Productivity and Innovation in Cornwall and the Isle of Scilly (EPIC) project, which is part funded by the European Regional Development Fund (ERDF). All of the above were 'general funds' to fund study in this area of endeavour. There were no specific funds for this project and there is no commercial or other interest from the funders in the findings of this study.

## Competing Interest

The authors declare that they have no competing interests.

## Author Contributions

All authors read and approved the manuscript.

HB designed the study, performed data collection, transcribed, analysed and interpreted results and lead on producing the manuscript.

KE transcribed data, analysed and interpreted results and aided in production of the original manuscript.

RW supervised the project, provided expertise and advice towards the study conception and design, discussed results and substantively revised the manuscript.

ST supervised the project, provided expertise and advice towards the study conception and design, discussed results and substantively revised the manuscript.

RJ oversaw participant recruitment and data collection, supervised the project, provided expertise and advice towards the study conception and design, discussed results and substantively revised the manuscript.

## Acknowledgements

Mrs M Jones, for knitting and kindly supplying the hedgehog used in this research.

Miss D Hubbard for assistance with participant recruitment.

Kirsty Langstaff for assistance with data collection.

Jake Gibson Shaw-Sutton for assistance with data collection and recording equipment.

Khaian Marsh for assistance with data collection and recording equipment.

The Ehealth Productivity and Innovation in Cornwall and the Isle of Scilly (EPIC) project, which is part funded by the European Regional Development Fund (ERDF), for the loan of some of the robots used in this research.

## Data Sharing

The datasets generated and analysed during this study are available at the Open Science Framework using the following link:

[https://osf.io/kps2w/?view\\_only=12ec0a445086403db685c3b41e1e3127](https://osf.io/kps2w/?view_only=12ec0a445086403db685c3b41e1e3127)

## References

1. Abdi J, Al-Hindawi A, Ng T, et al. Scoping review on the use of socially assistive robot technology in elderly care. *BMJ Open* 2018;8:e018815. doi:0.1136/bmjopen-2017-018815.
2. Garcon L, Khasnabis C, Walker L, et al. Medical and Assistive Health Technology: Meeting the Needs of Aging Populations. *Gerontologist* 2016;56(Suppl 2):S293-302. doi:10.1093/geront/gnw005 [published Online First: 18 March 2016].
3. Broadbent E, Stafford R, MacDonald B. Acceptance of Healthcare Robots for the Older Population: Review and Future Directions. *International Journal of Social Robotics* 2009;1(4):319. doi: 10.1007/s12369-009-0030-6 [published Online First: 3 October 2009].
4. Moyle W, Jones C, Pu L, et al. Applying user-centred research design and evidence to develop and guide the use of technologies, including robots, in aged care. *Contemporary Nurse* 2018;54(1):1-3. doi:10.1080/10376178.2017.1438057 [published Online First: 3 May 2018].
5. Steptoe A, Deaton A, Stone AA. Subjective wellbeing, health, and ageing. *The Lancet* 2015;385(9968):640-8. doi:10.1016/S0140-6736(13)61489-0 [published Online First: 6 November 2014].
6. Farrand P, Matthews J, Dickens C, et al. Psychological interventions to improve psychological well-being in people with dementia or mild cognitive impairment: systematic review and meta-analysis protocol. *BMJ Open* 2016;6(1):e009713. doi:10.1136/bmjopen-2015-009713

- 1  
2  
3  
4 7. Broekens J, Heerink M, Rosendal H. Assistive social robots in elderly care: A  
5 review. *Gerontechnology* 2009;8(2):94-103. doi:10.4017/gt.2009.08.02.002.00
- 6  
7 8. Moyle W, Cooke M, Beattie E, et al. Exploring the Effect of Companion  
8 Robots on Emotional Expression in Older Adults With Dementia: A Pilot Randomized  
9 Controlled Trial. *Journal of Gerontological Nursing* 2013;39(5):46-53.  
10 doi:10.3928/00989134-20130313-03 [published Online First: 22 March 2013].
- 11  
12 9. Soler MV, Aguera-Ortiz L, Rodriguez JO, et al. Social robots in advanced  
13 dementia. *Frontiers in Aging Neuroscience* 2015;7:133.  
14 doi:10.3389/fnagi.2015.00133 [published Online First: 3 September 2015]
- 15  
16 10. Pu L, Moyle W, Jones C, et al. The Effectiveness of Social Robots for Older  
17 Adults: A Systematic Review and Meta-Analysis of Randomized Controlled Studies.  
18 *The Gerontologist* 2019;59(1):e37-e51. doi: 10.1093/geront/gny046.
- 19  
20 11. Joranson N, Pedersen I, Rokstad AM, et al. Effects on Symptoms of Agitation  
21 and Depression in Persons With Dementia Participating in Robot-Assisted Activity: A  
22 Cluster-Randomized Controlled Trial. *J Am Med Dir Assoc* 2015;16(10):867-73.  
23 doi:10.1016/j.jamda.2015.05.002 [published Online First: 18 June 2015].
- 24  
25 12. Wada K, Shibata, T., Saito, T., et al. Psychological and Social Effects of One  
26 Year Robot Assisted Activity on Elderly People at a Health Service Facility for the  
27 Aged. *Proceedings of the 2005 IEEE International Conference on Robotics and*  
28 *Automation* 2005; Barcelona, Spain: IEEE. doi:10.1109/ROBOT.2005.1570535
- 29  
30 13. Saito T, Shibata T, Wada K, et al. Relationship between interaction with the  
31 mental commit robot and change of stress reaction of the elderly. *Proceedings 2003*  
32 *IEEE International Symposium on Computational Intelligence in Robotics and*  
33 *Automation* 2003; Kobe, Japan, p. 119-24. doi: 10.1109/CIRA.2003.1222074
- 34  
35 14. Liang A, Piroth I, Robinson H, et al. A Pilot Randomized Trial of a Companion  
36 Robot for People With Dementia Living in the Community. *Journal of the American*  
37 *Medical Directors Association* 2017;18(10):871-8. doi:10.1016/j.jamda.2017.05.019  
38 [published Online First: 28 June 2017].
- 39  
40 15. Petersen S, Houston, S., Qin, H., et al. The Utilization of Robotic Pets in  
41 Dementia Care. *Journal of Alzheimer's Disease* 2017;55:569-74. doi:10.3233/JAD-  
42 160703 [published Online First: 1 October 2016].
- 43  
44 16. Robinson H, MacDonald B, Broadbent E. Physiological effects of a  
45 companion robot on blood pressure of older people in residential care facility: a pilot  
46 study. *Australasian Journal On Ageing* 2015;34(1):27-32. doi:10.1111/ajag.12099  
47 [published Online First: 25 December 2013].
- 48  
49  
50  
51  
52  
53  
54  
55  
56  
57  
58  
59  
60



17. Misselhorn C, Pompe, U., Stapleton, M. Ethical Considerations Regarding the Use of Social Robots in the Fourth Age. *GeroPsych* 2013;26:121-33. doi: 10.1024/1662-9647/a000088 [published Online First: 15 May 2013].
18. Moyle W, Jones CJ, Murfield JE, et al. Use of a Robotic Seal as a Therapeutic Tool to Improve Dementia Symptoms: A Cluster-Randomized Controlled Trial. *J Am Med Dir Assoc* 2017;18(9):766-73. doi:10.1016/j.jamda.2017.03.018 [published Online First: 2 August 2017].
19. Robinson H, Macdonald B, Kerse N, et al. The psychosocial effects of a companion robot: a randomized controlled trial. *J Am Med Dir Assoc* 2013;14(9):661-7. doi: 10.1016/j.jamda.2013.02.007 [published Online First: 30 March 2013].
20. Thodberg K, Sorensen LU, Christensen JW, et al. Therapeutic effects of dog visits in nursing homes for the elderly. *Psychogeriatrics* 2016;16(5):289-97. doi:10.1111/psyg.12159 [published Online First: 29 October 2015].
21. Robinson H, MacDonald BA, Kerse N, et al. Suitability of Healthcare Robots for a Dementia Unit and Suggested Improvements. *J Am Med Dir Assoc* 2013;14(1):34-40. doi:10.1111/psyg.12159 [published Online First: 29 October 2015].
22. Moyle W, Jones C, Murfield J, et al. Using a therapeutic companion robot for dementia symptoms in long-term care: reflections from a cluster-RCT. *Aging & mental health* 2019;23(3):329-336. doi:10.1080/13607863.2017.1421617 [published Online First: 28 December 2017].
23. Odetti L, Anerdi G, Barbieri MP, et al. Preliminary experiments on the acceptability of animaloid companion robots by older people with early dementia. *Proceedings of the 29th Annual International Conference of the IEEE EMBS* 2007;1816-1819. Lyon, France. doi:10.1109/IEMBS.2007.4352666
24. Tamura T, Yonemitsu S, Itoh A, et al. Is an Entertainment Robot Useful in the Care of Elderly People With Severe Dementia? *The Journals of Gerontology: Series A* 2004;59(1):M83-M5. doi:10.1093/gerona/59.1.M83
25. Heerink M, Kröse B, Evers V, et al. Assessing Acceptance of Assistive Social Agent Technology by Older Adults: the Almere Model. *International Journal of Social Robotics* 2010;2(4):361-75. doi:10.1007/s12369-010-0068-5 [published Online First: 4 September 2010].
26. Chammas A, Quaresma M, Mont'Alvão C. A Closer Look on the User Centred Design. *Procedia Manufacturing* 2015;3:5397-404. doi:10.1016/j.promfg.2015.07.656 [published Online First: 23 October 2015].
27. Orrell M, Hancock GA, Liyanage KC, et al. The needs of people with dementia in care homes: the perspectives of users, staff and family caregivers. *Int*

1  
2  
3  
4 *Psychogeriatr* 2008;20(5):941-51. doi:10.1017/S1041610208007266 [published  
5 Online First: 17 April 2008].

6 28. Pino M, Boulay M, Jouen F, et al. "Are we ready for robots that care for us?"  
7 Attitudes and opinions of older adults toward socially assistive robots. *Front Aging*  
8 *Neurosci* 2015;7:141. doi:10.3389/fnagi.2015.00141 [published Online First: 23 July  
9 2015].

10 29. Green A, Hüttenrauch H, Norman M, et al. User centered design for intelligent  
11 service robots. *Proceedings 9th IEEE International Workshop on Robot and Human*  
12 *Interactive Communication* 2000;161-166. Osaka, Japan. doi:  
13 10.1109/ROMAN.2000.892488

14 30. Sandoval E, Penaloza C. Children's knowledge and expectations about  
15 robots: A survey for future user-centered design of social robots. 7th ACM/IEEE  
16 International Conference on Human-Robot Interaction (HRI); 2012;107-108. Boston,  
17 MA.

18 31. Wu YH, Cristancho-Lacroix V, Fassert C, et al. The Attitudes and Perceptions  
19 of Older Adults With Mild Cognitive Impairment Toward an Assistive Robot. *J Appl*  
20 *Gerontol* 2016;35(1):3-17. doi:10.1177/0733464813515092 [published Online First: 9  
21 January 2014].

22 32. Lazar A, Thompson H, Piper AM, et al. Rethinking the Design of Robotic Pets  
23 for Older Adults. *Proceedings of the 2016 ACM Conference on Designing Interactive*  
24 *Systems* 2016; Brisbane, QLD, Australia. doi:10.1145/2901790.2901811

25 33. Frennert S, Östlund, B. Review: Seven Matters of Concern of Social Robotics  
26 and Older People. *International Journal of Social Robotics* 2014;6(2):299-310. doi:  
27 10.1007/s12369-013-0225-8 [published Online First: 29 January 2014].

28 34. Heerink M, Albo-Canals J, Valenti-Soler M, et al. Exploring Requirements and  
29 Alternative Pet Robots for Robot Assisted Therapy with Older Adults with Dementia.  
30 *Proceedings of the 5th International Conference on Social Robotics* 2018;104-15.  
31 Bristol, UK. doi:10.1007/978-3-319-02675-6\_11

32 35. Vaismoradi M, Turunen H, Bondas T. Content analysis and thematic analysis:  
33 Implications for conducting a qualitative descriptive study. *Nursing & Health*  
34 *Sciences* 2013;15(3):398-405. doi: 10.1111/nhs.12048 [published Online First: 11  
35 March 2013].

36 36. Mayring P. Qualitative Content Analysis. *Forum: Qualitative Social Research*  
37 2000;1(2). <http://www.qualitative-research.net/index.php/fqs/article/view/1089/2385>  
38 (accessed 3 March 2019).

39 37. Elo S, Kyngäs H. The qualitative content analysis process. *Journal of*  
40 *Advanced Nursing* 2008;62(1):107-15. doi:10.1111/j.1365-2648.2007.04569.x  
41 [published Online First: 18 March 2008].

- 1  
2  
3  
4 38. Bayne K. Development of the Human-Research Animal Bond and Its Impact  
5 on Animal Well-being. *ILAR Journal* 2002;43(1):4-9. doi:10.1093/ilar.43.1.4  
6  
7 39. Kachouie R, Sedighadeli S, Khosla R, et al. Socially Assistive Robots in  
8 Elderly Care: A Mixed-Method Systematic Literature Review. *International Journal of*  
9 *Human-Computer Interaction* 2014;30(5):369-93.  
10 doi:10.1080/10447318.2013.873278 [published Online First 1 April 2014].  
11  
12 40. Klamer T, Allouch SB. Acceptance and use of a social robot by elderly users  
13 in a domestic environment. *2010 4th International Conference on Pervasive*  
14 *Computing Technologies for Healthcare* 2010;22-25. Munich, Germany.  
15 doi:10.4108/ICST.PERVASIVEHEALTH2010.8892  
16  
17 41. Shibata T, Wada K. Robot therapy: a new approach for mental healthcare of  
18 the elderly - a mini-review. *Gerontology* 2011;57(4):378-86. doi:10.1159/000319015  
19 [published Online First: 15 July 2010].  
20  
21 42. Jones T, Lawson S, Mills D. Interaction with a zoomorphic robot that exhibits  
22 canid mechanisms of behaviour. *2008 IEEE International Conference on Robotics*  
23 *and Automation* 2008;2128-2133. Pasadena, CA.  
24 doi:10.1109/ROBOT.2008.4543521  
25  
26 43. Komatsu T, Yamada S. How Does the Agents' Appearance Affect Users'  
27 Interpretation of the Agents' Attitudes: Experimental Investigation on Expressing the  
28 Same Artificial Sounds From Agents With Different Appearances. *International*  
29 *Journal of Human-Computer Interaction* 2011;27(3):260-279.  
30 doi:10.1080/10447318.2011.537209 [published Online First: 2 February 2011].  
31  
32 44. Abubshait A, Wiese E. You Look Human, But Act Like a Machine: Agent  
33 Appearance and Behavior Modulate Different Aspects of Human-Robot Interaction.  
34 *Front Psychol* 2017;8(1393). doi:10.3389/fpsyg.2017.01393 [published Online First  
35 23 August 2017].  
36  
37 45. de Graaf MMA, Ben Allouch S, van Dijk JAGM. Why Would I Use This in My  
38 Home? A Model of Domestic Social Robot Acceptance. *Human-Computer*  
39 *Interaction* 2017;34(2):115-73. doi:10.1080/07370024.2017.1312406 [published  
40 Online First: 21 July 2017].  
41  
42 46. Jung MM, van der Leij L, Kelders SM. An Exploration of the Benefits of an  
43 Animallike Robot Companion with More Advanced Touch Interaction Capabilities for  
44 Dementia Care. *Frontiers in ICT* 2017;4:1-11. doi:10.3389/fict.2017.00016 [published  
45 Online First: 26 June 2017].  
46  
47 47. Shibata T, Tanie K. Influence of a priori knowledge in subjective interpretation  
48 and evaluation by short-term interaction with mental commit robot. *Proceedings 2000*  
49 *IEEE/RSJ International Conference on Intelligent Robots and Systems* 2000;169-174  
50 Takamatsu, Japan. doi:10.1109/IROS.2000.894600  
51  
52  
53  
54  
55  
56  
57  
58  
59  
60

- 1  
2  
3  
4 48. Murray JK, Browne WJ, Roberts MA, et al. Number and ownership profiles of  
5 cats and dogs in the UK. *Veterinary Record* 2010;166(6):163. doi: 10.1136/vr.b4712  
6 [published Online First: 6 February 2010].  
7  
8 49. Hsieh HF, Wang JJ. Effect of reminiscence therapy on depression in older  
9 adults: a systematic review. *International Journal of Nursing Studies* 2003;40(4):335-  
10 45. doi:10.1016/S0020-7489(02)00101-3 [published Online First: 25 February 2003].  
11  
12 50. Syed Elias SM, Neville C, Scott T. The effectiveness of group reminiscence  
13 therapy for loneliness, anxiety and depression in older adults in long-term care: A  
14 systematic review. *Geriatric Nursing* 2015;36(5):372-80.  
15 doi:10.1016/j.gerinurse.2015.05.004 [published Online First: 19 June 2015].  
16  
17 51. Mori M, MacDorman KF, Kageki N. The Uncanny Valley [From the Field].  
18 *IEEE Robotics & Automation Magazine* 2012;19(2):98-100.  
19 doi:10.1109/MRA.2012.2192811  
20  
21 52. Easton K, Potter S, Bec R, et al. A Virtual Agent to Support Individuals Living  
22 with Physical and Mental Comorbidities: Co-Design and Acceptability Testing.  
23 *Journal of Medical Internet Research* 2019;21(5):e12996. doi:10.2196/12996  
24  
25 53. Wu YH, Wrobel J, Cornuet M, et al. Acceptance of an assistive robot in older  
26 adults: a mixed-method study of human–robot interaction over a 1-month period in  
27 the Living Lab setting. *Clinical Interventions in Aging* 2014;9:801-11.  
28 doi:10.2147/CIA.S56435  
29  
30  
31  
32  
33  
34  
35  
36

## 37 Figure Legends

38  
39  
40 **Figure 1: Robots and toys at each interaction station, and the associated**  
41 **features for comparison**  
42  
43

44  
45 **Figure 2: Interaction Station 2**  
46

47 **Figure 3: Choice of robot/toy for use with older people, shown by participant**  
48 **group**  
49

50  
51  
52 **Figure 4: Mapping the relationship between older people’s unprompted**  
53 **opinions and focus group themes**  
54  
55  
56  
57  
58  
59  
60

1  
2  
3  
4  
5  
6  
7  
8  
9  
10  
11  
12  
13  
14  
15  
16  
17  
18  
19  
20  
21  
22  
23  
24  
25  
26  
27  
28  
29  
30  
31  
32  
33  
34  
35  
36  
37  
38  
39  
40  
41  
42  
43  
44  
45  
46  
47  
48  
49  
50  
51  
52  
53  
54  
55  
56  
57  
58  
59  
60

| Station                                                                                                                                     | Animal robot/toy                                                                                              | Range of features for comparison                                                                                                                                                                                  |
|---------------------------------------------------------------------------------------------------------------------------------------------|---------------------------------------------------------------------------------------------------------------|-------------------------------------------------------------------------------------------------------------------------------------------------------------------------------------------------------------------|
| 1 – All soft-fur, differing levels of interactivity, familiar and unfamiliar options                                                        |  <p>Paro</p>                 | <ul style="list-style-type: none"> <li>• Unfamiliar</li> <li>• Not life-like</li> <li>• Interactive</li> <li>• Animal noises</li> <li>• No life-simulation</li> <li>• Soft-fur</li> </ul>                         |
|                                                                                                                                             |  <p>Joy for All dog</p>      | <ul style="list-style-type: none"> <li>• Familiar</li> <li>• Life-like</li> <li>• Interactive</li> <li>• Animal noises</li> <li>• Life-simulation (heart beat)</li> <li>• Soft-fur</li> </ul>                     |
|                                                                                                                                             |  <p>Joy for All cat</p>      | <ul style="list-style-type: none"> <li>• Familiar</li> <li>• Life-like</li> <li>• Interactive</li> <li>• Animal noises</li> <li>• Life-simulation (purring)</li> <li>• Soft-fur</li> </ul>                        |
| 2 – Interactivity vs soft-fur, interactive devices have plastic shells, soft-furry dog is non-interactive. Familiar and unfamiliar options. |  <p>Miro</p>                 | <ul style="list-style-type: none"> <li>• Unfamiliar</li> <li>• Not life-like</li> <li>• Interactive</li> <li>• Non-animal noises</li> <li>• No life-simulation</li> <li>• Hard-shell</li> </ul>                   |
|                                                                                                                                             |  <p>Pleo rb</p>              | <ul style="list-style-type: none"> <li>• Unfamiliar</li> <li>• Not life-like</li> <li>• Interactive</li> <li>• Non-animal noises</li> <li>• No life-simulation</li> <li>• Soft-plastic shell</li> </ul>           |
|                                                                                                                                             |  <p>Perfect Petzzz Dog</p> | <ul style="list-style-type: none"> <li>• Familiar</li> <li>• Life-like</li> <li>• Non-interactive</li> <li>• No noises</li> <li>• Life-simulation (breathing)</li> <li>• Soft-fur</li> </ul>                      |
| 3 – Mythical, unfamiliar option, human speech, completely inert option. Personalisable option.                                              |  <p>Furby</p>              | <ul style="list-style-type: none"> <li>• Unfamiliar</li> <li>• Not life-like (mythical)</li> <li>• Interactive</li> <li>• Non-animal noises (speech)</li> <li>• No life-simulation</li> <li>• Soft-fur</li> </ul> |
|                                                                                                                                             |  <p>Hedgehog</p>           | <ul style="list-style-type: none"> <li>• Unfamiliar</li> <li>• Not life-like</li> <li>• Non-interactive</li> <li>• No noises</li> <li>• No life-simulation</li> <li>• Soft-fur</li> </ul>                         |

Figure 1: Robots and toys at each interaction station, and the associated features for comparison

90x234mm (300 x 300 DPI)

1  
2  
3  
4  
5  
6  
7  
8  
9  
10  
11  
12  
13  
14  
15  
16

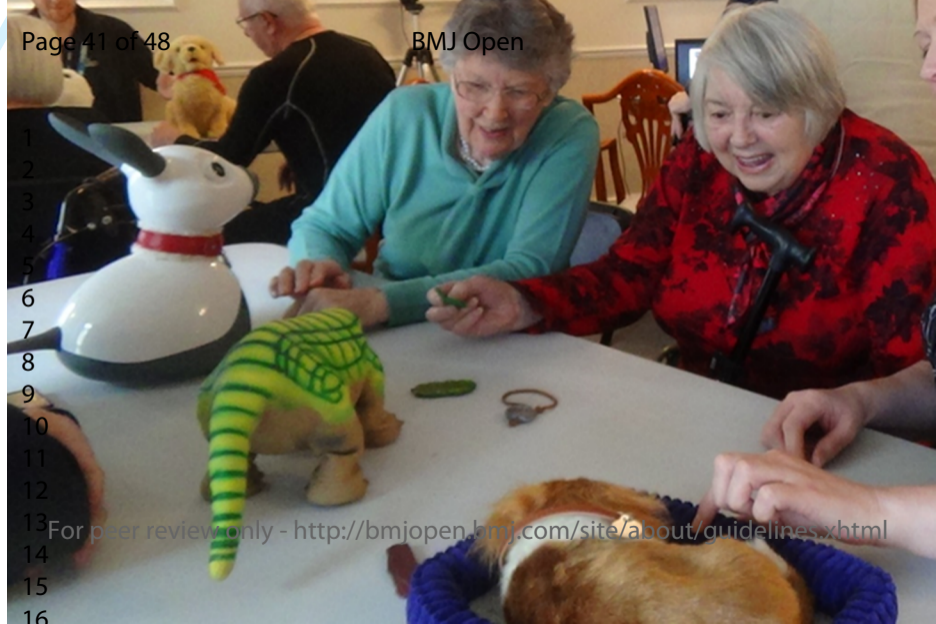



Figure 3: Choice of robot/toy for use with older people, shown by participant group

137x109mm (300 x 300 DPI)

1  
2  
3  
4  
5  
6  
7  
8  
9  
10  
11  
12  
13  
14  
15  
16  
17  
18  
19  
20  
21  
22  
23  
24  
25  
26  
27  
28  
29  
30  
31  
32  
33  
34  
35  
36  
37  
38  
39  
40  
41  
42  
43  
44  
45  
46  
47  
48  
49  
50  
51  
52  
53  
54  
55  
56  
57  
58  
59  
60



Figure 4: Mapping the relationship between older people's unprompted opinions and focus group themes

119x90mm (300 x 300 DPI)



## Supplementary Materials

Table 1: Further examples of older people's and roboticists responses during focus group discussions.

| Theme         | Older People                                                                                                                                                                                                                                                                                                                                                                                                                                                                                               | Example Evidence                                                                                                                                                                                                                                                                                                                                                                                                                                                                                                                                                                                                                                                                               | Robotocists |
|---------------|------------------------------------------------------------------------------------------------------------------------------------------------------------------------------------------------------------------------------------------------------------------------------------------------------------------------------------------------------------------------------------------------------------------------------------------------------------------------------------------------------------|------------------------------------------------------------------------------------------------------------------------------------------------------------------------------------------------------------------------------------------------------------------------------------------------------------------------------------------------------------------------------------------------------------------------------------------------------------------------------------------------------------------------------------------------------------------------------------------------------------------------------------------------------------------------------------------------|-------------|
| Interactivity | <p>“it [Pleo] interacted more so you could spend loads of time just playing” (OP4)</p> <p>“If you're sat there on your own, you want some reaction” (OP6)</p> <p>“He [Joy for All dog] had more interaction, he was doing more of less what I wanted him to do” (OP15)</p> <p>“I'd like it to respond to me” (OP7)</p> <p>“That one [Joy for All cat] is almost perfect, but perhaps if you could say, do you want to play, and then it could then do something, a little bit more interactive” (OP13)</p> | <p>“The more sensors it has, and the more functionality it has the better, so they wouldn't get bored so easily, more it interacts” (R1)</p> <p>“I think something passive, that doesn't make a lot of sounds, it could be stressful, too much [sic] You could have a sack that's warm and purrs” (R3)</p> <p>“I think it should have high level interaction, because it would keep the interaction longer as well, if you just have a pet like this with one or two features, it's done, it's limited” (R9)</p> <p>“I don't know, thinking of older people, I like the idea of a cat, it could just be on your lap and purrs, it doesn't have to look at you, cats don't generally” (R18)</p> |             |
| Soft fur      | <p>“Day to day cleaning, you could wipe over it [Pleo], furry thing would be harder” (OP5)</p> <p>“Soft furry face, the dinosaur interaction was good but it's still like dragging your hand over rubber” (OP6)</p> <p>“you can't stroke plastic” (OP10)</p> <p>“Furry, the seal [Paro] was lovely” (OP12)</p>                                                                                                                                                                                             | <p>“It should be soft” (R4)</p> <p>“Definitely have the fluffiness of the seal, around the same level of interactivity” (R5)</p> <p>“The dinosaur is cute but the texture is horrific” (R8)</p> <p>“The fur is attractive” (R10)</p> <p>“I don't think so, because it isn't cleanable, if you wanted something to</p>                                                                                                                                                                                                                                                                                                                                                                          |             |

1  
2  
3  
4  
5  
6  
7  
8  
9  
10  
11  
12  
13  
14  
15  
16  
17  
18  
19  
20  
21  
22  
23  
24  
25  
26  
27  
28  
29  
30  
31  
32  
33  
34  
35  
36  
37  
38  
39  
40  
41  
42  
43  
44  
45  
46  
47  
48  
49  
50  
51  
52  
53  
54  
55  
56  
57  
58  
59  
60

---

“Fur I think so. The plastic I found very cold, not something you would, sorta, cuddle” (OP13)

cuddle you could just buy a stuffed toy” (R14)

“if you’re having an animal, it has to have animal fur” (OP14)

“Nice and furry, you could kinda cuddle it” (R18)

---

Talking

“Yes, because there’s a lot of time in your flat on your own, just having something to interact with” (OP1)

“from a technological point of view, speech should be left out of the equation, especially with elderly people, and people with dementia, they wouldn’t have expressions or fully structured sentences which would get frustrating if the robot didn’t understand” (R1)

“It might be nice to have a conversation” “If you said to it what’s your name, it would be nice if it could” (OP3)

“[animals] don’t talk, there are sounds that creatures make” (OP6)

“If you’re going for animals, then I don’t think speech is important [sic] yeah animal sounds” (R2)

“If you went in the front door, if it just said sorta, hello! That would be nice” (OP8)

“I think it is important that the robot is honest, with what it understands, it shouldn’t pretend to understand more than it actually understands, which is the case with Pepper, you get frustrated” (R3)

“Picking up something like that and talking, it could be good” (OP11)

“For older people living on their own in particular, we all talk to ourselves anyway, you don’t feel so stupid if you talk to something that responds to you” (OP13)

“It actually gets annoying because it’s repetitive, there is this boundary, where if you’ve interacted for five minutes.... It gets annoying.” (R6)

“I’m not sure, I’ve read about these Japanese and American ones that you can have a whole conversation with, highly sophisticated, but there’s no understanding at all” (OP16)

“People with advanced dementia, it’s really hard to interact with” (R7)

“No, if you make it talk there are a thousand ways to make it talk creepy as well, sounds would be better” (R9)

“I can see the appeal, [sic] a rudimentary conversation might be quite nice, as long as you didn’t feel like a twit doing it” (R11)

“It would take away from the intelligence of the thing” (R15)

---

Personalisation

---

1  
2  
3  
4  
5  
6  
7  
8  
9  
10  
11  
12  
13  
14  
15  
16  
17  
18  
19  
20  
21  
22  
23  
24  
25  
26  
27  
28  
29  
30  
31  
32  
33  
34  
35  
36  
37  
38  
39  
40  
41  
42  
43  
44  
45  
46  
47  
48  
49  
50  
51  
52  
53  
54  
55  
56  
57  
58  
59  
60

“not everyone likes a dog, or there’s a particular colour they want” (OP1)

“I think that’s brilliant” (OP3)

“Yes it would be nice to have a squirrel” (OP4)

“If it was knitted, it wouldn’t be able to move its eyes and mouth” (OP5)

“Yeah, different ones, a Persian cat” (OP11)

“It’s quite a good idea, yeah I do, someone who’s got a particular animal”  
“We were talking about colours, I like that one, she’s always had black cats, It would be nice to have a choice of different colours” (OP13)

“If you had someone in mind, so and so really liked black cats” (OP17)

“That might ruin the illusion I’d say” “if you’ve eaten like a chicken, if you’ve seen the actual process, you would not feel so good about it [sic], when you see the finished product without knowing how, it’s sometimes better” (R2)

“would create love and contact and proximity” (R5)

“People get more attached to it because they created it” (R6)

“I’m not sure if it’s a little patronising” (R7)

“It would be amazing, it would give it a personal touch, it’s like having a new [smartphone] and getting a new cover, people love that” (R10)

“my mum has a cat, she gets quite lonely, but if you had her make a fake cat, it just wouldn’t work” (R14)

“it could take away from the magic of the thing” (R15)

Realistic

“For someone who’s always had animals, they feel that loss, so for them, something realistic that they could interact with” (OP1)

“yeah realistic” (OP9)

“For older people, stick to cats and dogs” (OP12)

“I would prefer life like” (OP11)

“It’s better to have something that’s familiar, and real” (OP16)

“as long as it’s got big eyes and attractive I don’t mind” (OP17)

“It would make more sense” (R1)

“I think it matters less how it looks” (R3)

“I think it could not be so realistic, because (inaudible) expectations” (R9)

“As long as they’re animals, I don’t see an issue with it being realistic or non-realistic” (R11)

“I’m not sure it does, if anything the cat is too real without looking quite right” (R13)

1  
2  
3  
4  
5  
6  
7  
8  
9  
10  
11  
12  
13  
14  
15  
16  
17  
18  
19  
20  
21  
22  
23  
24  
25  
26  
27  
28  
29  
30  
31  
32  
33  
34  
35  
36  
37  
38  
39  
40  
41  
42  
43  
44  
45  
46  
47  
48  
49  
50  
51  
52  
53  
54  
55  
56  
57  
58  
59  
60

---

“I feel like it has to look cute but that doesn’t necessarily mean it has to look realistic” (R15)

“No it can be whatever, if it’s not realistic, you wouldn’t be hoping it would be a real dog so” (R16)

---

Familiarity

“because they [cat and dog] are more domesticated animals, whereas a seal you wouldn’t have a seal in your home” (OP1)

“for older people stick to cats and dogs, like, might not know what a squirrel is perhaps” (OP10)

“I think if you’d had a cat or a dog, it would be better to have something you could relate to” (OP12)

“It’s better to have something that’s familiar” (OP16)

“for the elderly it should be something familiar” (R2)

“interactivity is more important, you are not interacting with these animals by looking [sic]” “I don’t think it has to be recognisable, it’s more important how it feels, the movements, sounds, purring, but you could put it in a Pokemon” (R3)

“I think because of uncanny valley it doesn’t have to be something that we are used too” (R7)

“a baby seal, you’re not accustomed to the animal so whatever it does is just cute [sic] you’re not accustomed to it” (R8)

“We’re accustomed to dogs and cats and maybe a fake dog or cat seems to be kind of creepy, but Paro, I’m not accustomed to seals” (R9)

“The [Joy for All] dog doesn’t do what it is expected to do, it doesn’t run around or get up like a dog does, I think because people don’t have expectations of what a seal does, they would imagine that’s what it would do, so with the other’s it would cause frustration they didn’t do what was expected” (R15)

“I think we don’t really know what a seal is or does, so you kind of imagine that’s what it would do, where as the others you have some expectations of which could frustrate you” (R17)

---

Mythical

---

|    |                 |  |
|----|-----------------|--|
| 1  |                 |  |
| 2  |                 |  |
| 3  |                 |  |
| 4  |                 |  |
| 5  |                 |  |
| 6  |                 |  |
| 7  |                 |  |
| 8  |                 |  |
| 9  |                 |  |
| 10 |                 |  |
| 11 |                 |  |
| 12 |                 |  |
| 13 |                 |  |
| 14 |                 |  |
| 15 |                 |  |
| 16 |                 |  |
| 17 |                 |  |
| 18 |                 |  |
| 19 |                 |  |
| 20 |                 |  |
| 21 |                 |  |
| 22 |                 |  |
| 23 |                 |  |
| 24 | Life simulation |  |
| 25 |                 |  |
| 26 |                 |  |
| 27 |                 |  |
| 28 |                 |  |
| 29 |                 |  |
| 30 |                 |  |
| 31 |                 |  |
| 32 |                 |  |
| 33 |                 |  |
| 34 |                 |  |
| 35 |                 |  |
| 36 |                 |  |
| 37 |                 |  |
| 38 |                 |  |
| 39 |                 |  |
| 40 |                 |  |
| 41 |                 |  |
| 42 |                 |  |
| 43 |                 |  |
| 44 |                 |  |
| 45 |                 |  |
| 46 |                 |  |
| 47 |                 |  |
| 48 |                 |  |
| 49 |                 |  |
| 50 |                 |  |
| 51 |                 |  |
| 52 |                 |  |
| 53 |                 |  |
| 54 |                 |  |
| 55 |                 |  |
| 56 |                 |  |
| 57 |                 |  |
| 58 |                 |  |
| 59 |                 |  |
| 60 |                 |  |

“That’s a generation thing, kids would love it but not here” (OP1)

“That [Furby] is just a head, not one like that” “I want it to be more like an animals” (OP10)

“the mythical one is suitable for a child” (OP13)

“I wouldn’t want a mythical one at this time” (OP15)

“Maybe in five years time..” (OP16)

“I also think something super unrealistic like the Furby would be creepy as well, it’s so bizarre you could be turned off by it, it’s weird, a baby seal, you’re not accustomed to the animal so whatever it does is just cute” (R8)

“The mythical Furby looks right because you’ve got no expectations, so you cannot do it wrong, you cannot break expectations” (R13)

“Warmth under belly to keep your knees warm!” (OP1)

“Yes I like the Purring” (OP2)

“Make you feel comforted” (OP13).

“If it was breathing, it would be almost a real cat, and again, it’s a soothing thing” (OP14)

“It would [sic] make them [older people] want to pet it more” (R2)

“I can feel on the dinosaur, coming from an engineering point of view, with all that inside and trouble circulating the air, you can feel it gets warm, but I think that’s actually a good thing, that you can feel, it’s even more, like lizard like, even more appearing like something” (R6)

“The problem is I think it has to be done well, and it’s really difficult to do well, it could end up creepy and weird” (R14)
